# Supplementary material
Source: PubMed Central journal article supplement (PMC9017071)

|                                                                                                                      |    |
|----------------------------------------------------------------------------------------------------------------------|----|
| Table of Contents: Supplemental Forest plots of meta-analyses on the associations between parenting factors and ADHD |    |
| Figure S1. Divorce and ADHD overall, dichotomous outcomes.....                                                       | 2  |
| Figure S2. Divorce and ADHD overall, continuous outcomes.....                                                        | 3  |
| Figure S3. Divorce and ADHD disorder diagnosis, dichotomous outcomes.....                                            | 4  |
| Figure S4. Single parenting and ADHD overall, dichotomous outcomes.....                                              | 5  |
| Figure S5. Parental incarceration and ADHD overall, continuous outcomes.....                                         | 6  |
| Figure S6. General maltreatment and ADHD overall, dichotomous outcomes.....                                          | 7  |
| Figure S7. General maltreatment and ADHD overall, continuous outcomes.....                                           | 8  |
| Figure S8. General maltreatment and ADHD diagnosis, dichotomous outcomes.....                                        | 9  |
| Figure S9. General maltreatment and inattention, continuous outcomes.....                                            | 10 |
| Figure S10. Physical abuse and ADHD overall, continuous outcomes.....                                                | 11 |
| Figure S11. Sensitivity/warmth and ADHD overall, continuous outcomes.....                                            | 12 |
| Figure S12. Sensitivity/warmth and inattention, continuous outcomes.....                                             | 13 |
| Figure S13. Sensitivity/warmth and hyperactivity/impulsivity, continuous outcomes.....                               | 14 |
| Figure S14. Intrusiveness/reactivity and ADHD overall, continuous outcomes.....                                      | 15 |
| Figure S15. Negativity/harsh discipline and ADHD overall, continuous outcomes.....                                   | 16 |
| Figure S16. Media exposure and ADHD overall, dichotomous outcomes.....                                               | 17 |
| Figure S17. Media exposure and ADHD overall, continuous outcomes.....                                                | 18 |
| Figure S18. Media exposure and inattention, dichotomous outcomes.....                                                | 19 |
| Figure S19. Media exposure and inattention, continuous outcomes.....                                                 | 20 |

**Figure S1.** Forest plot of meta-analysis of divorce and attention-deficit/hyperactivity disorder (ADHD) overall\* based on studies reporting dichotomous outcomes

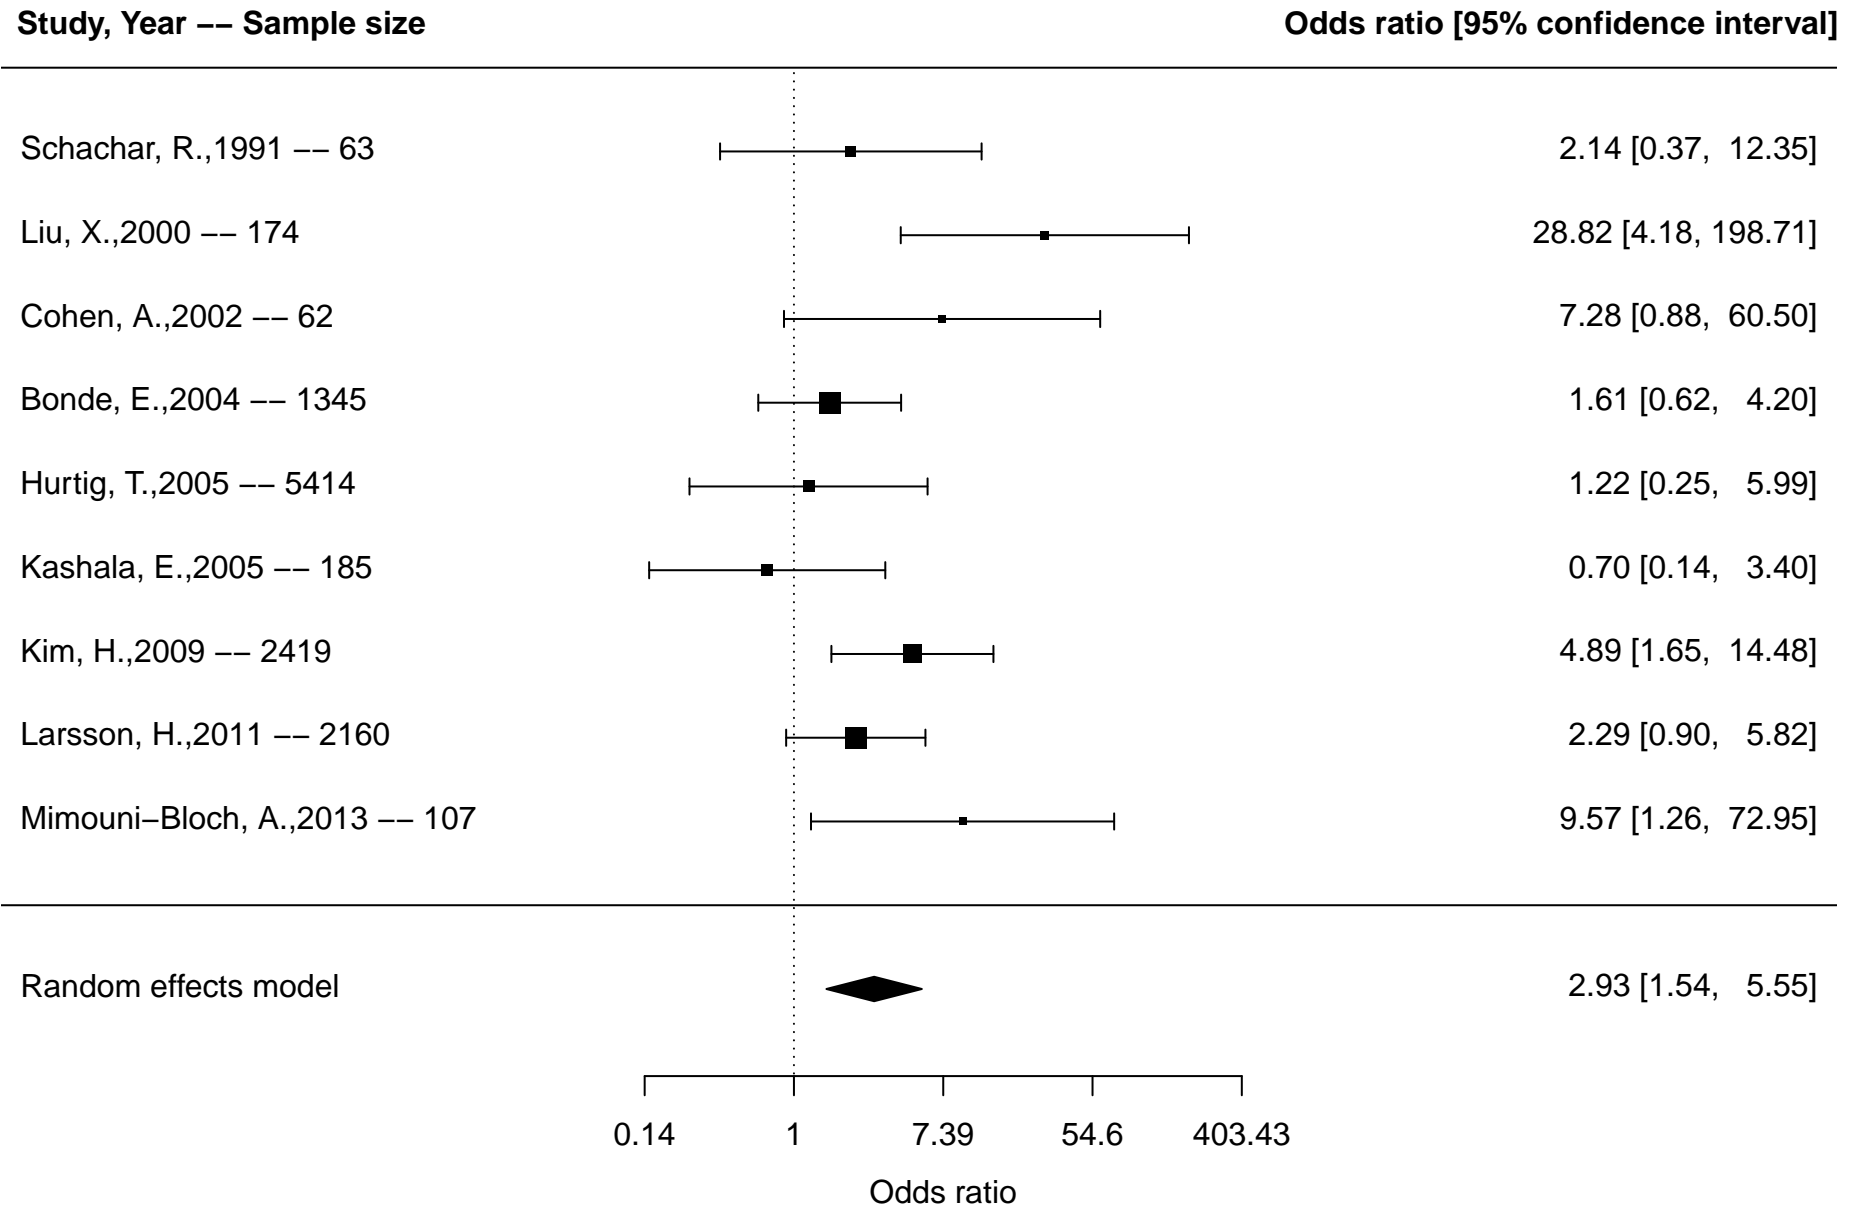

\*Overall includes studies reporting on any included ADHD outcomes (diagnosis, ADHD symptoms, inattention, hyperactivity/impulsivity)

**Figure S2.** Forest plot of meta-analysis of divorce and attention-deficit/hyperactivity disorder (ADHD) overall\* based on studies reporting continuous outcomes

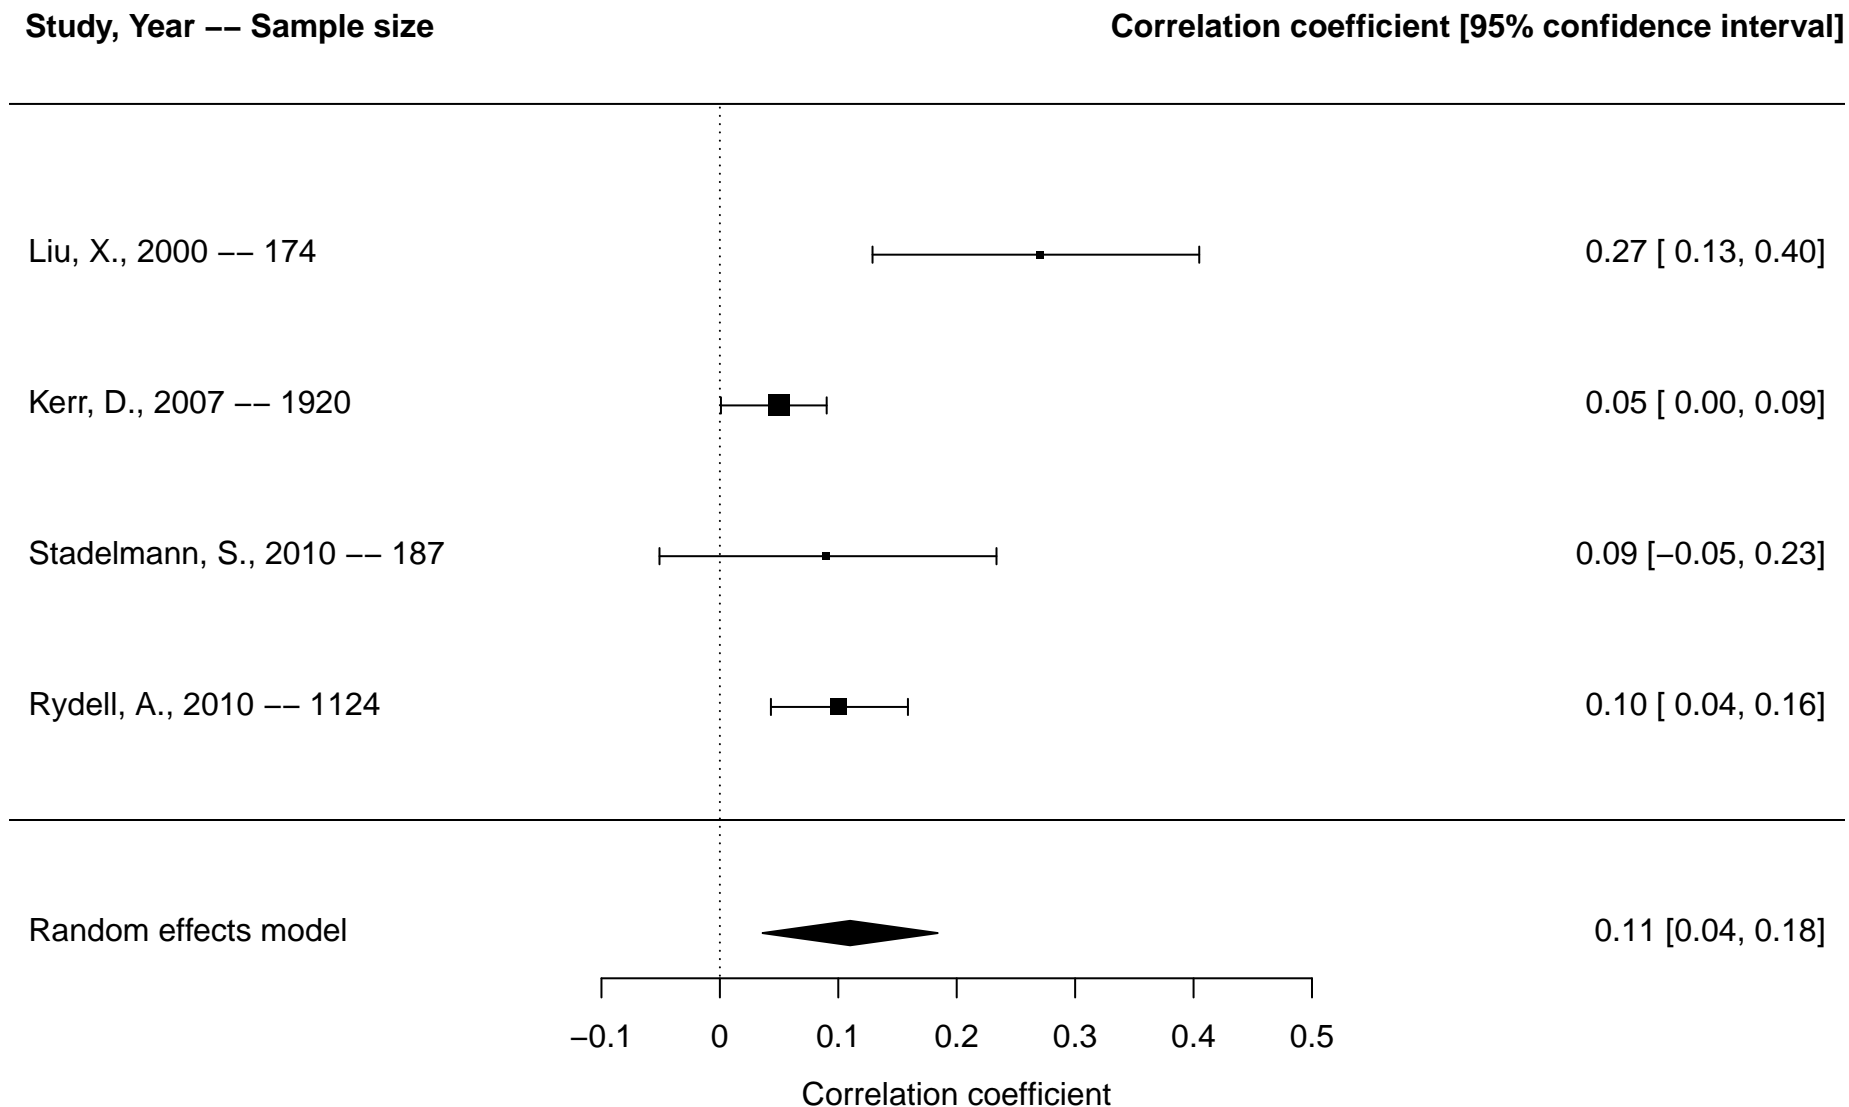

\*Overall includes studies reporting on any included ADHD outcomes (diagnosis, ADHD symptoms, inattention, hyperactivity/impulsivity)

**Figure S3.** Forest plot of meta-analysis of divorce and attention-deficit/hyperactivity disorder (ADHD) diagnosis based on studies reporting dichotomous outcomes

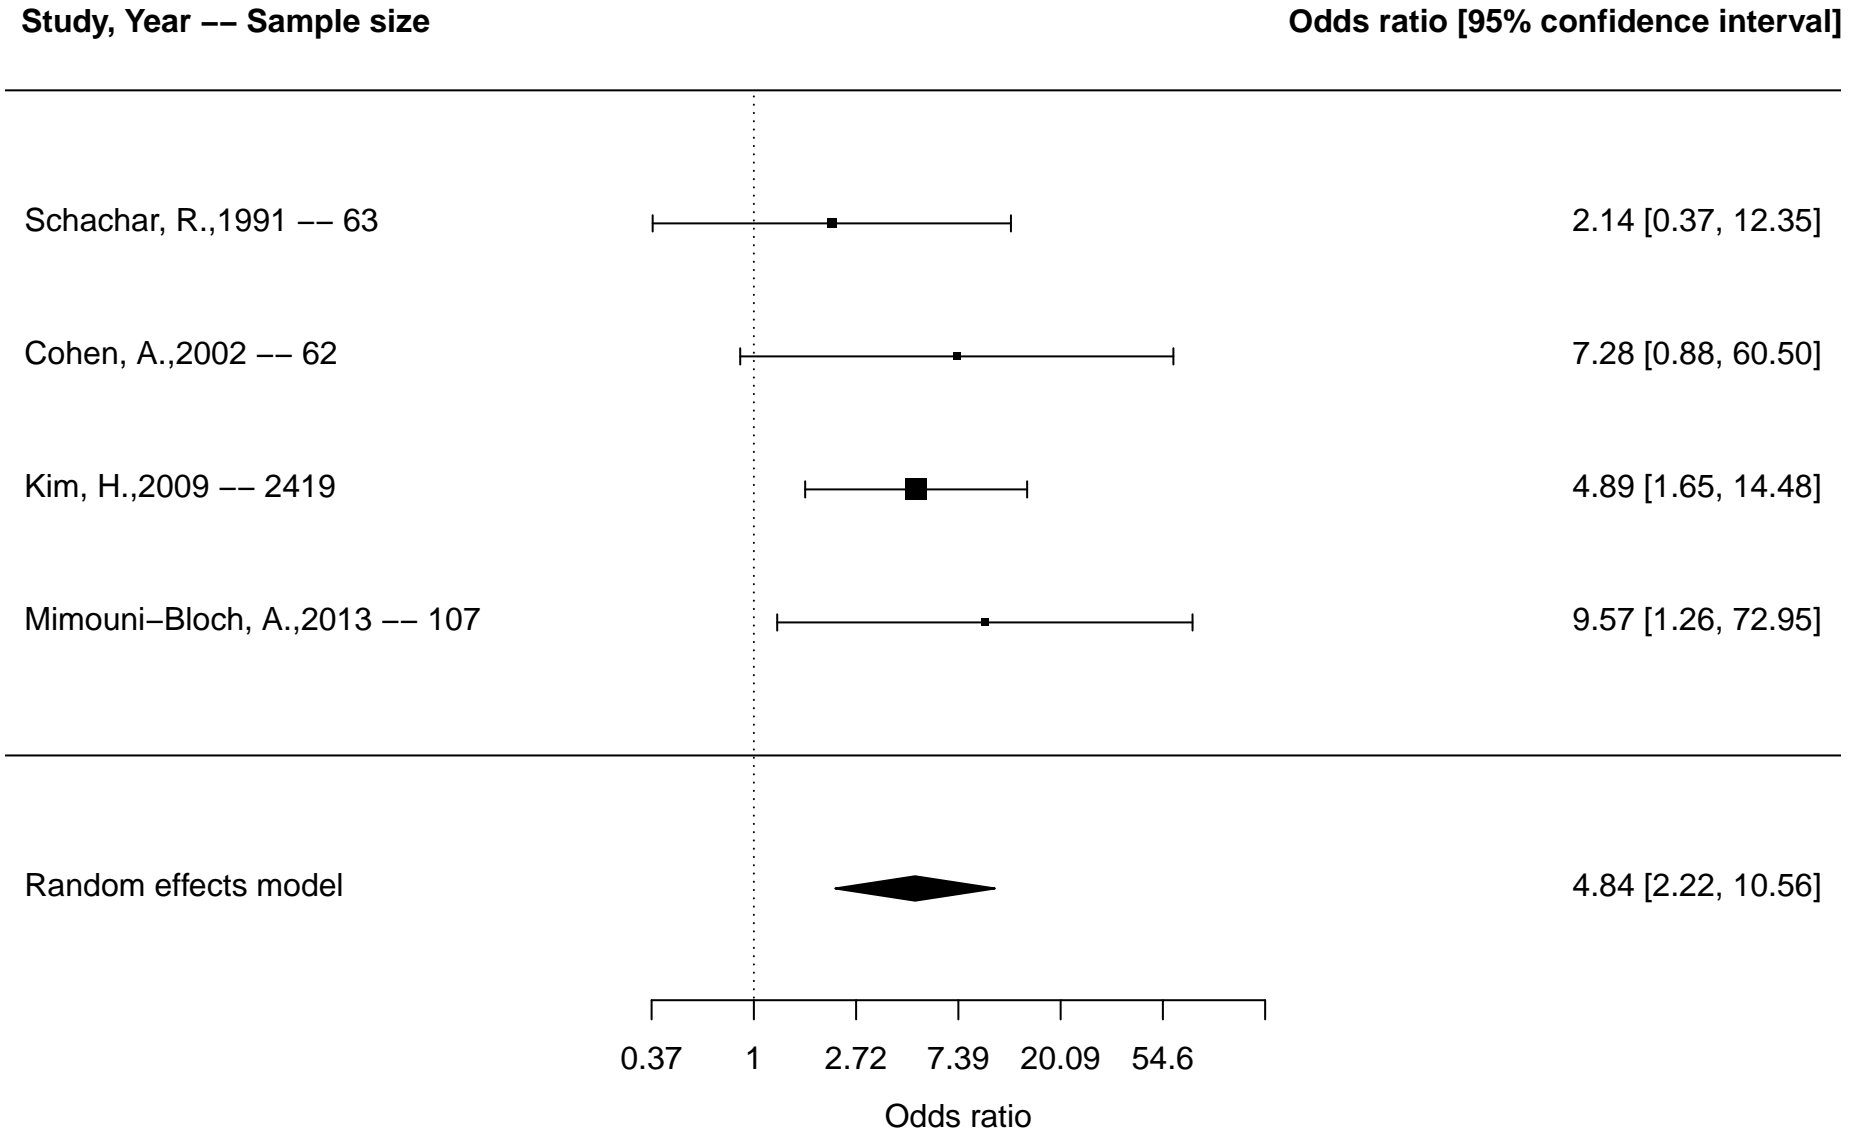

**Figure S4.** Forest plot of meta-analysis of single parenting and attention-deficit/hyperactivity disorder (ADHD) overall\* based on studies reporting dichotomous outcomes

**Study, Year -- Sample size**

**Odds ratio [95% confidence interval]**

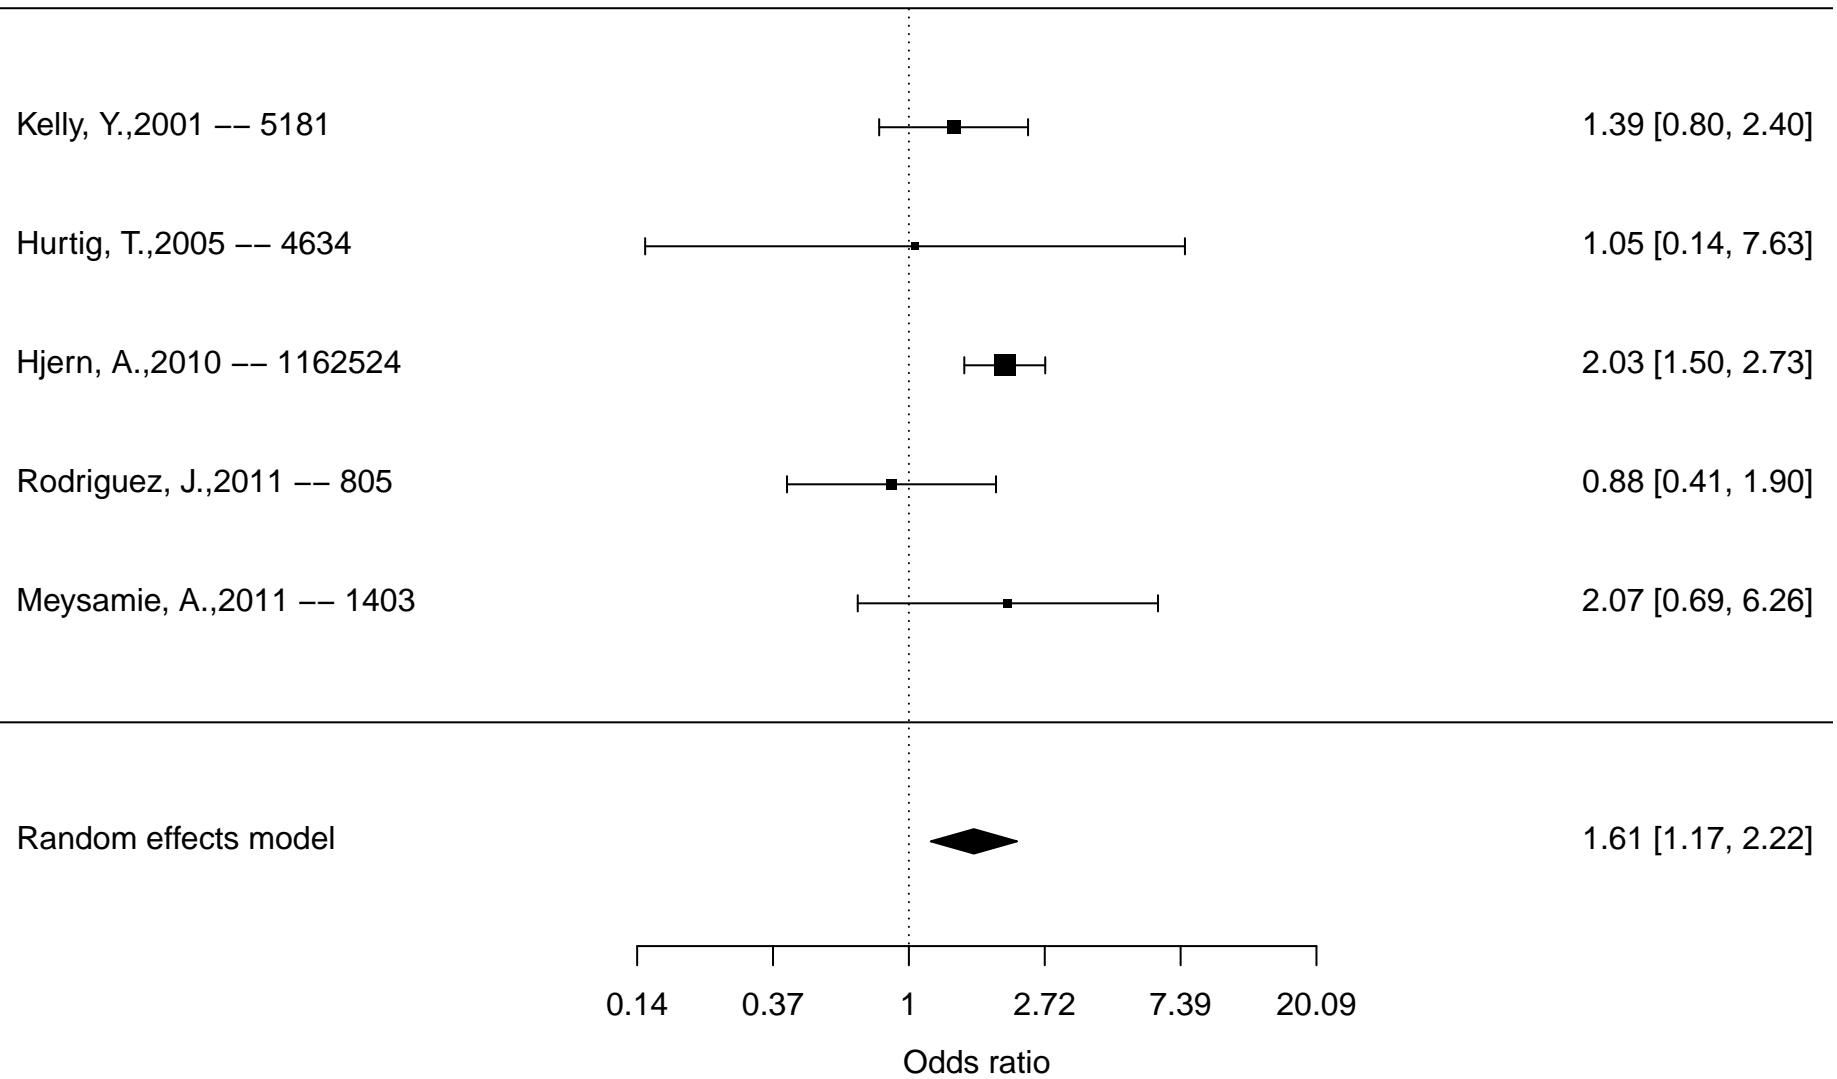

\*Overall includes studies reporting on any included ADHD outcomes (diagnosis, ADHD symptoms, inattention, hyperactivity/impulsivity)

**Figure S5.** Forest plot of meta-analysis of parental incarceration/arrest and attention-deficit/hyperactivity disorder (ADHD) overall\* based on studies reporting continuous outcomes

**Study, Year -- Sample size**

**Correlation coefficient [95% confidence interval]**

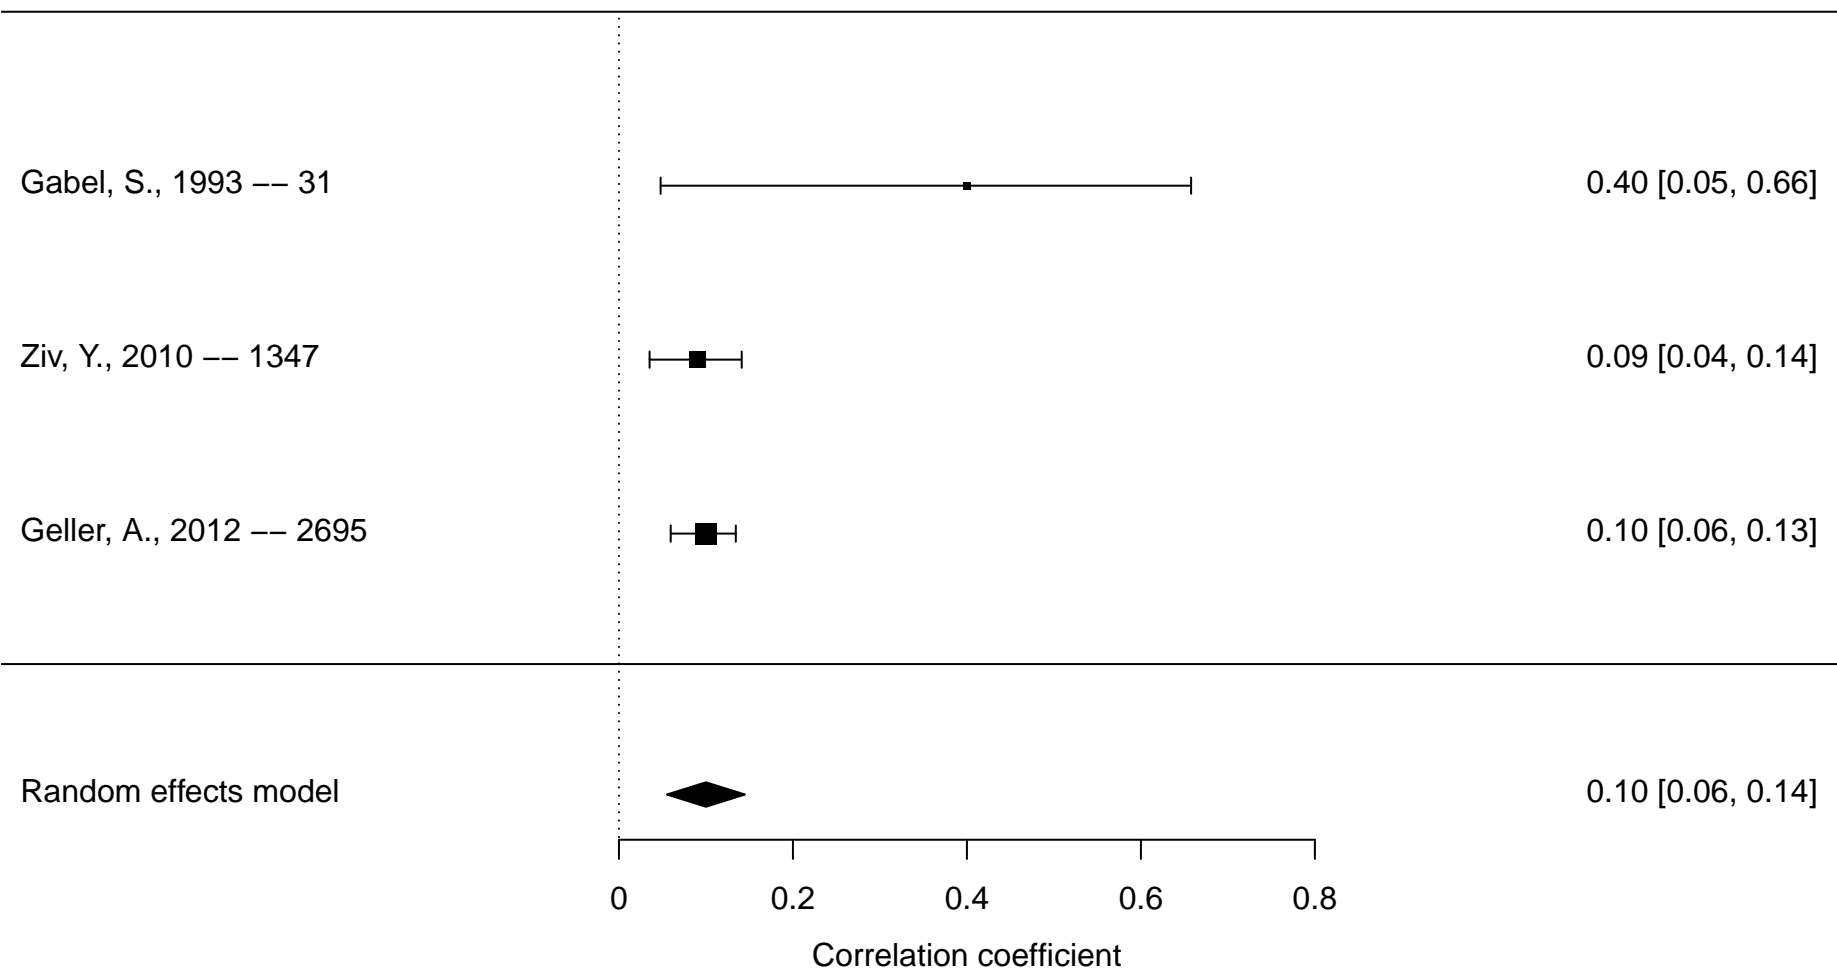

\*Overall includes studies reporting on any included ADHD outcomes (diagnosis, ADHD symptoms, inattention, hyperactivity/impulsivity)

**Figure S6.** Forest plot of meta-analysis of general maltreatment and attention-deficit/hyperactivity disorder (ADHD) overall\* based on studies reporting dichotomous outcomes

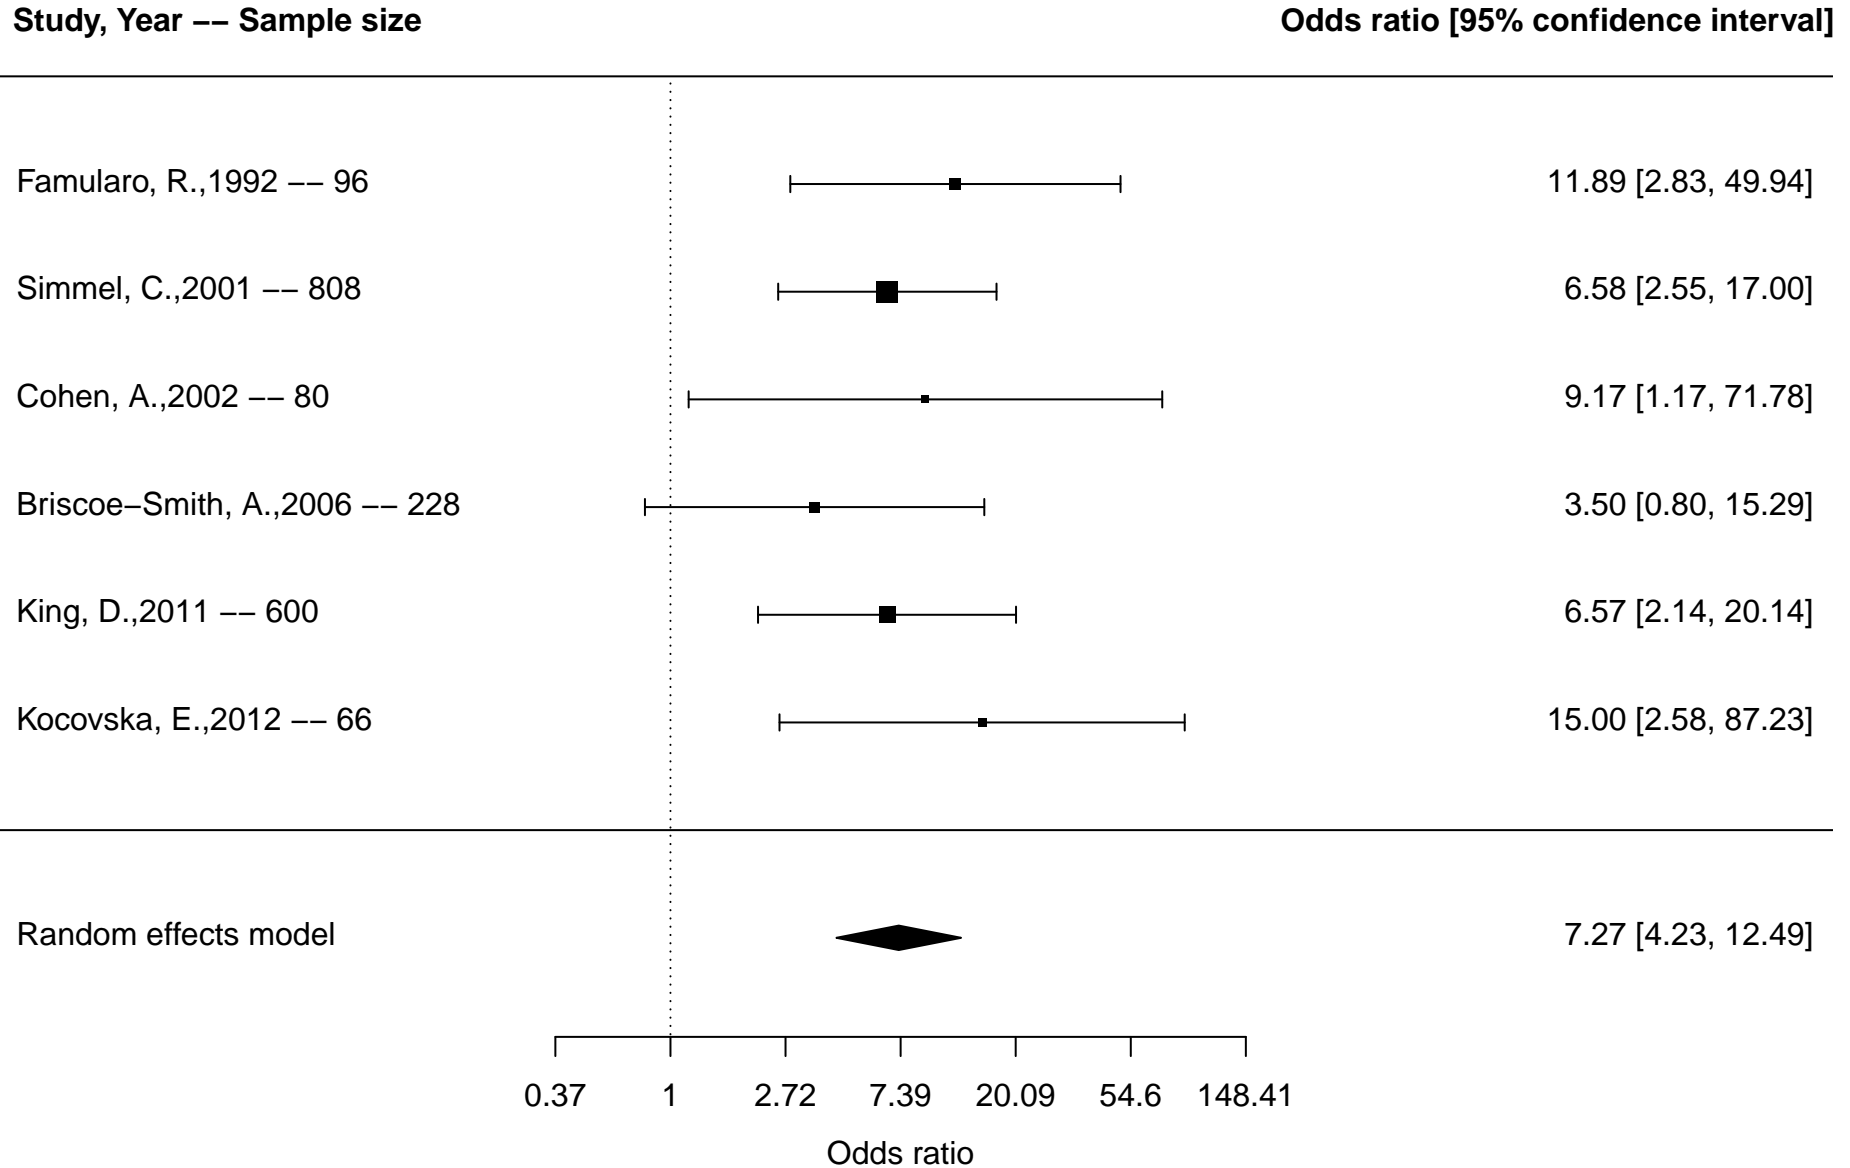

\*Overall includes studies reporting on any included ADHD outcomes (diagnosis, ADHD symptoms, inattention, hyperactivity/impulsivity)

**Figure S7.** Forest plot of meta-analysis of general maltreatment and attention-deficit/hyperactivity disorder (ADHD) overall\* based on studies reporting continuous outcomes

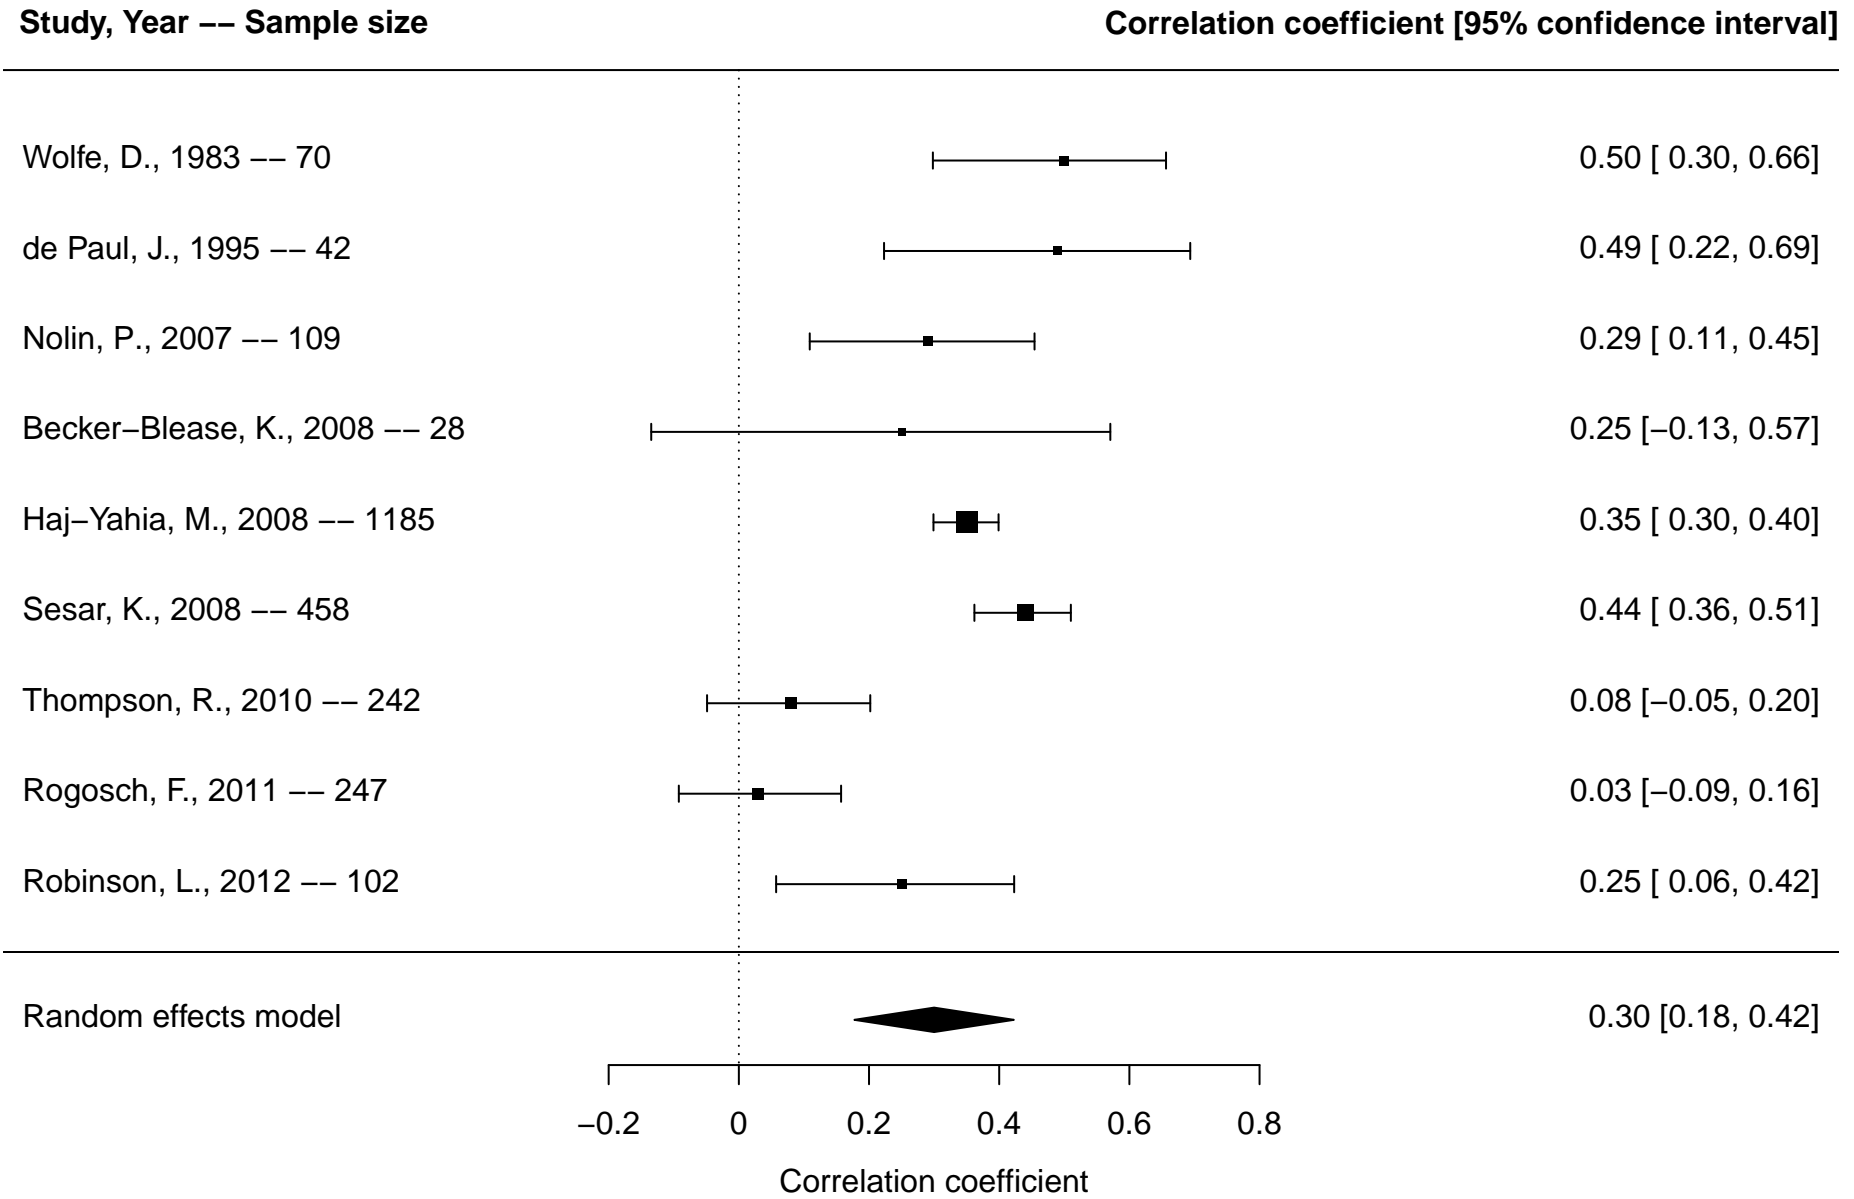

\*Overall includes studies reporting on any included ADHD outcomes (diagnosis, ADHD symptoms, inattention, hyperactivity/impulsivity)



**Figure S8.** Forest plot of meta-analysis of general maltreatment and attention-deficit/hyperactivity disorder (ADHD) diagnosis based on studies reporting dichotomous outcomes

**Study, Year -- Sample size**

**Odds ratio [95% confidence interval]**

Famularo, R.,1992 -- 96

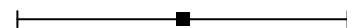

11.89 [2.83, 49.94]

Cohen, A.,2002 -- 80

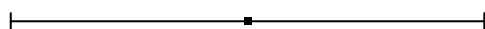

9.17 [1.17, 71.78]

Briscoe-Smith, A.,2006 -- 228

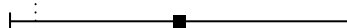

3.50 [0.80, 15.29]

King, D.,2011 -- 600

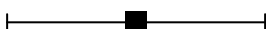

6.57 [2.14, 20.14]

Kocovska, E.,2012 -- 66

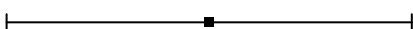

15.00 [2.58, 87.23]

Random effects model

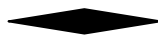

7.63 [3.95, 14.75]

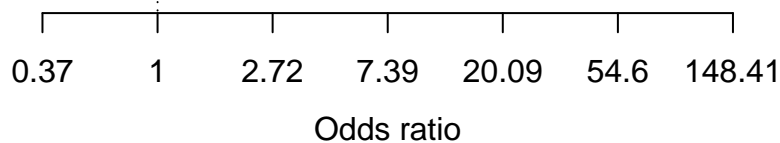

**Figure S9.** Forest plot of meta-analysis of general maltreatment and inattention based on studies reporting continuous outcomes

**Study, Year -- Sample size**

**Correlation coefficient [95% confidence interval]**

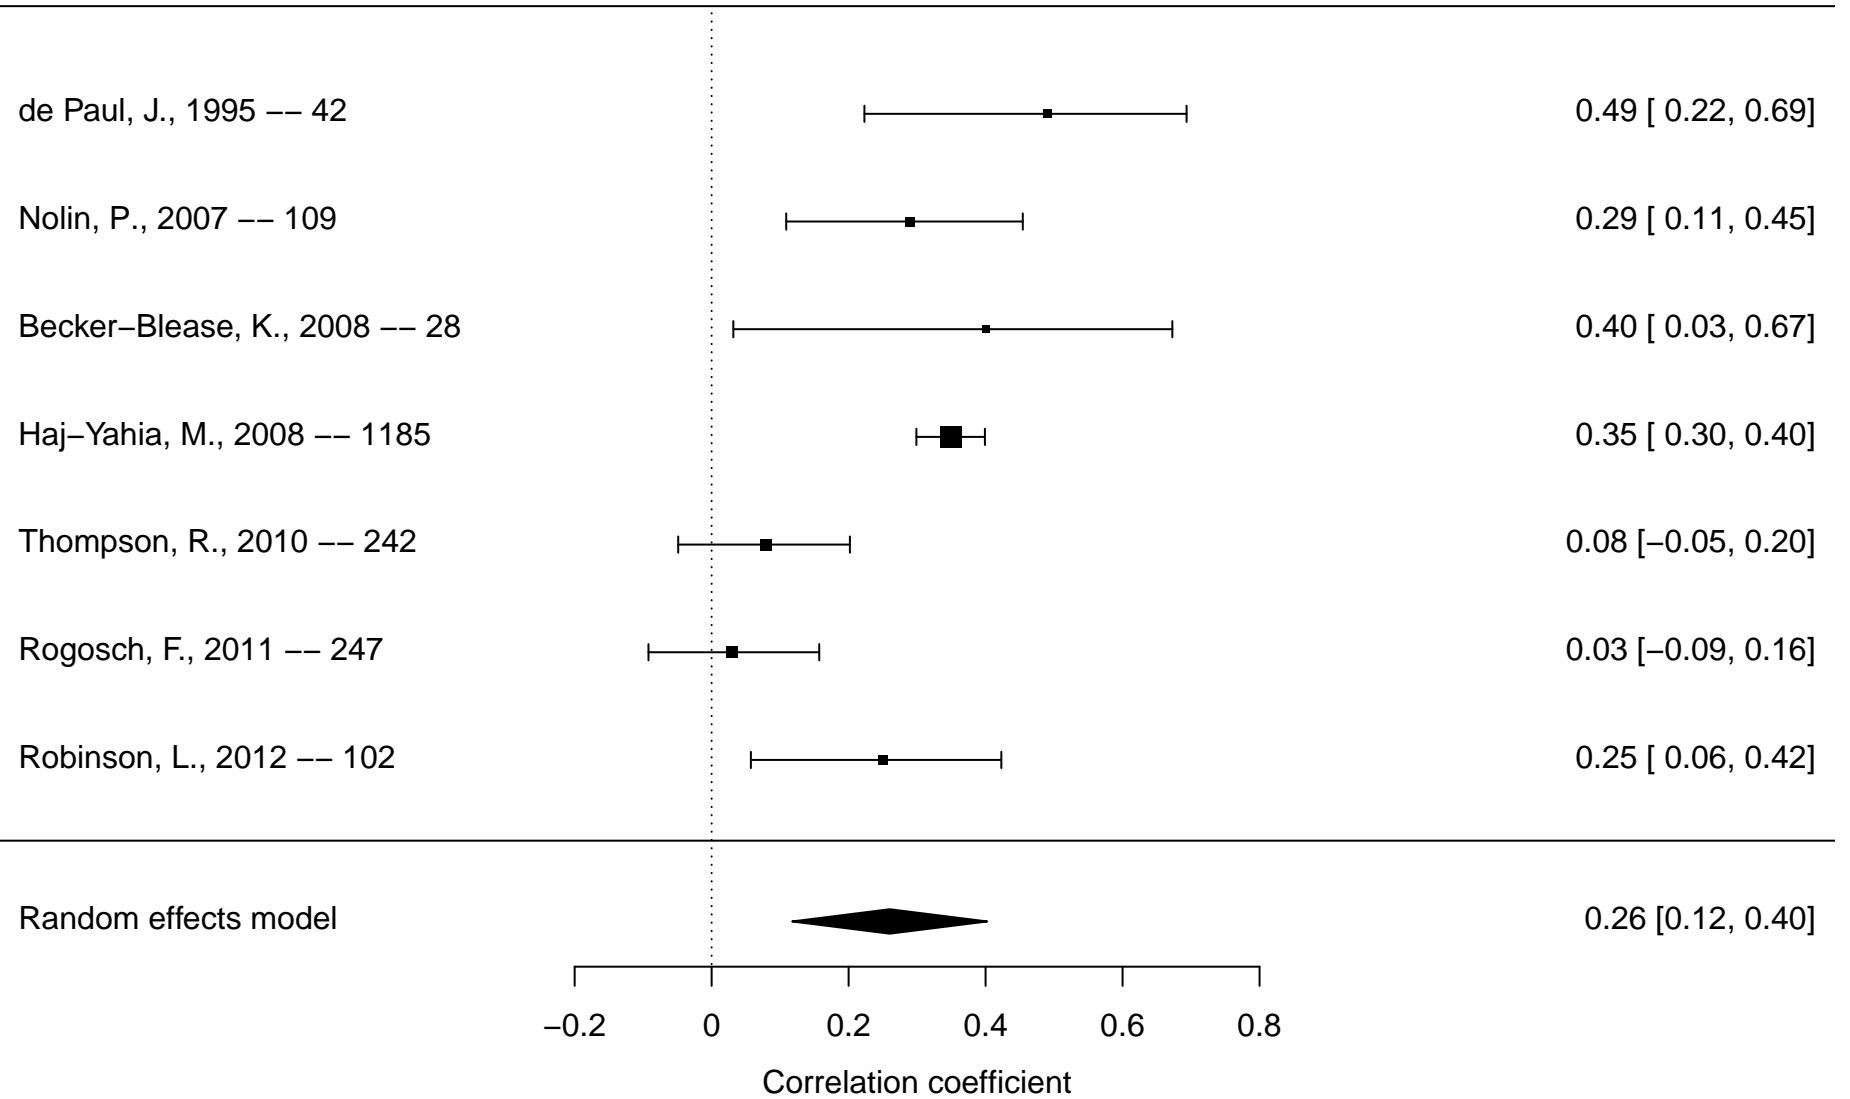

**Figure S10.** Forest plot of meta-analysis of physical abuse and attention-deficit/hyperactivity disorder (ADHD) overall\* based on studies reporting continuous outcomes

**Study, Year -- Sample size**

**Correlation coefficient [95% confidence interval]**

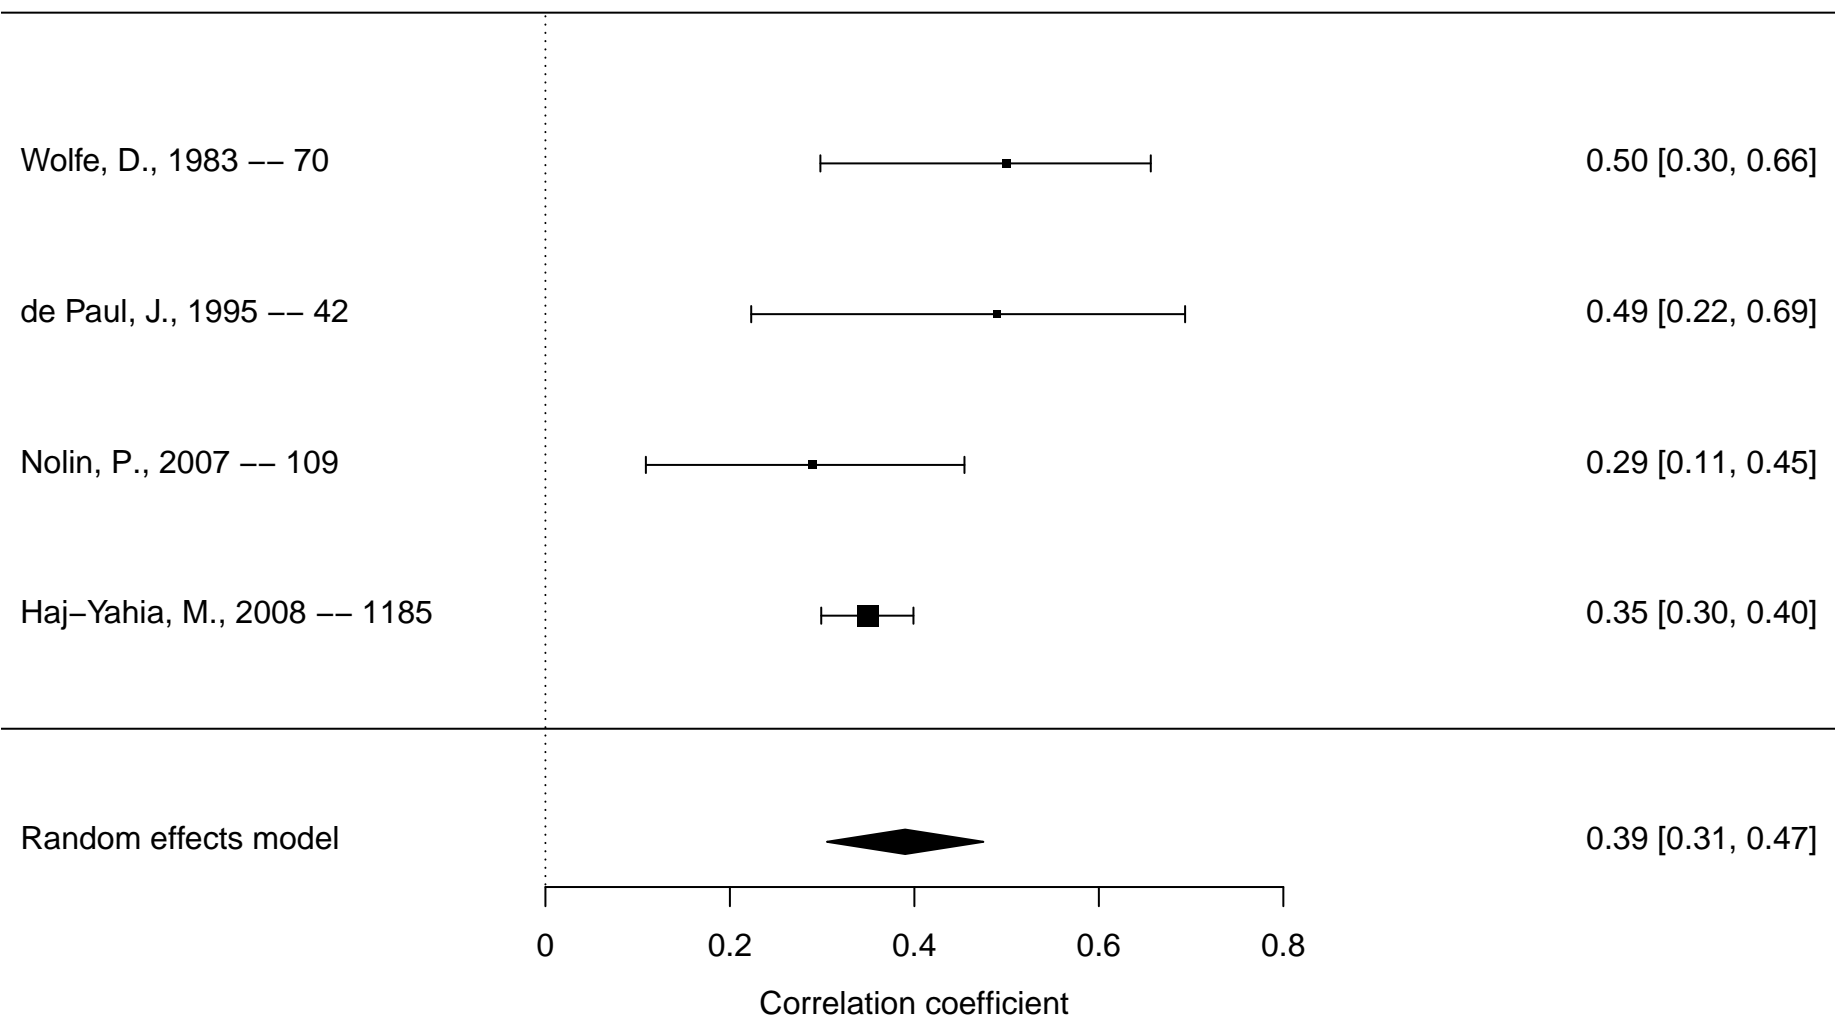

\*Overall includes studies reporting on any included ADHD outcomes (diagnosis, ADHD symptoms, inattention, hyperactivity/impulsivity)

**Figure S11.** Forest plot of meta-analysis of sensitivity/warmth and attention-deficit/hyperactivity disorder (ADHD) overall\* based on studies reporting continuous outcomes

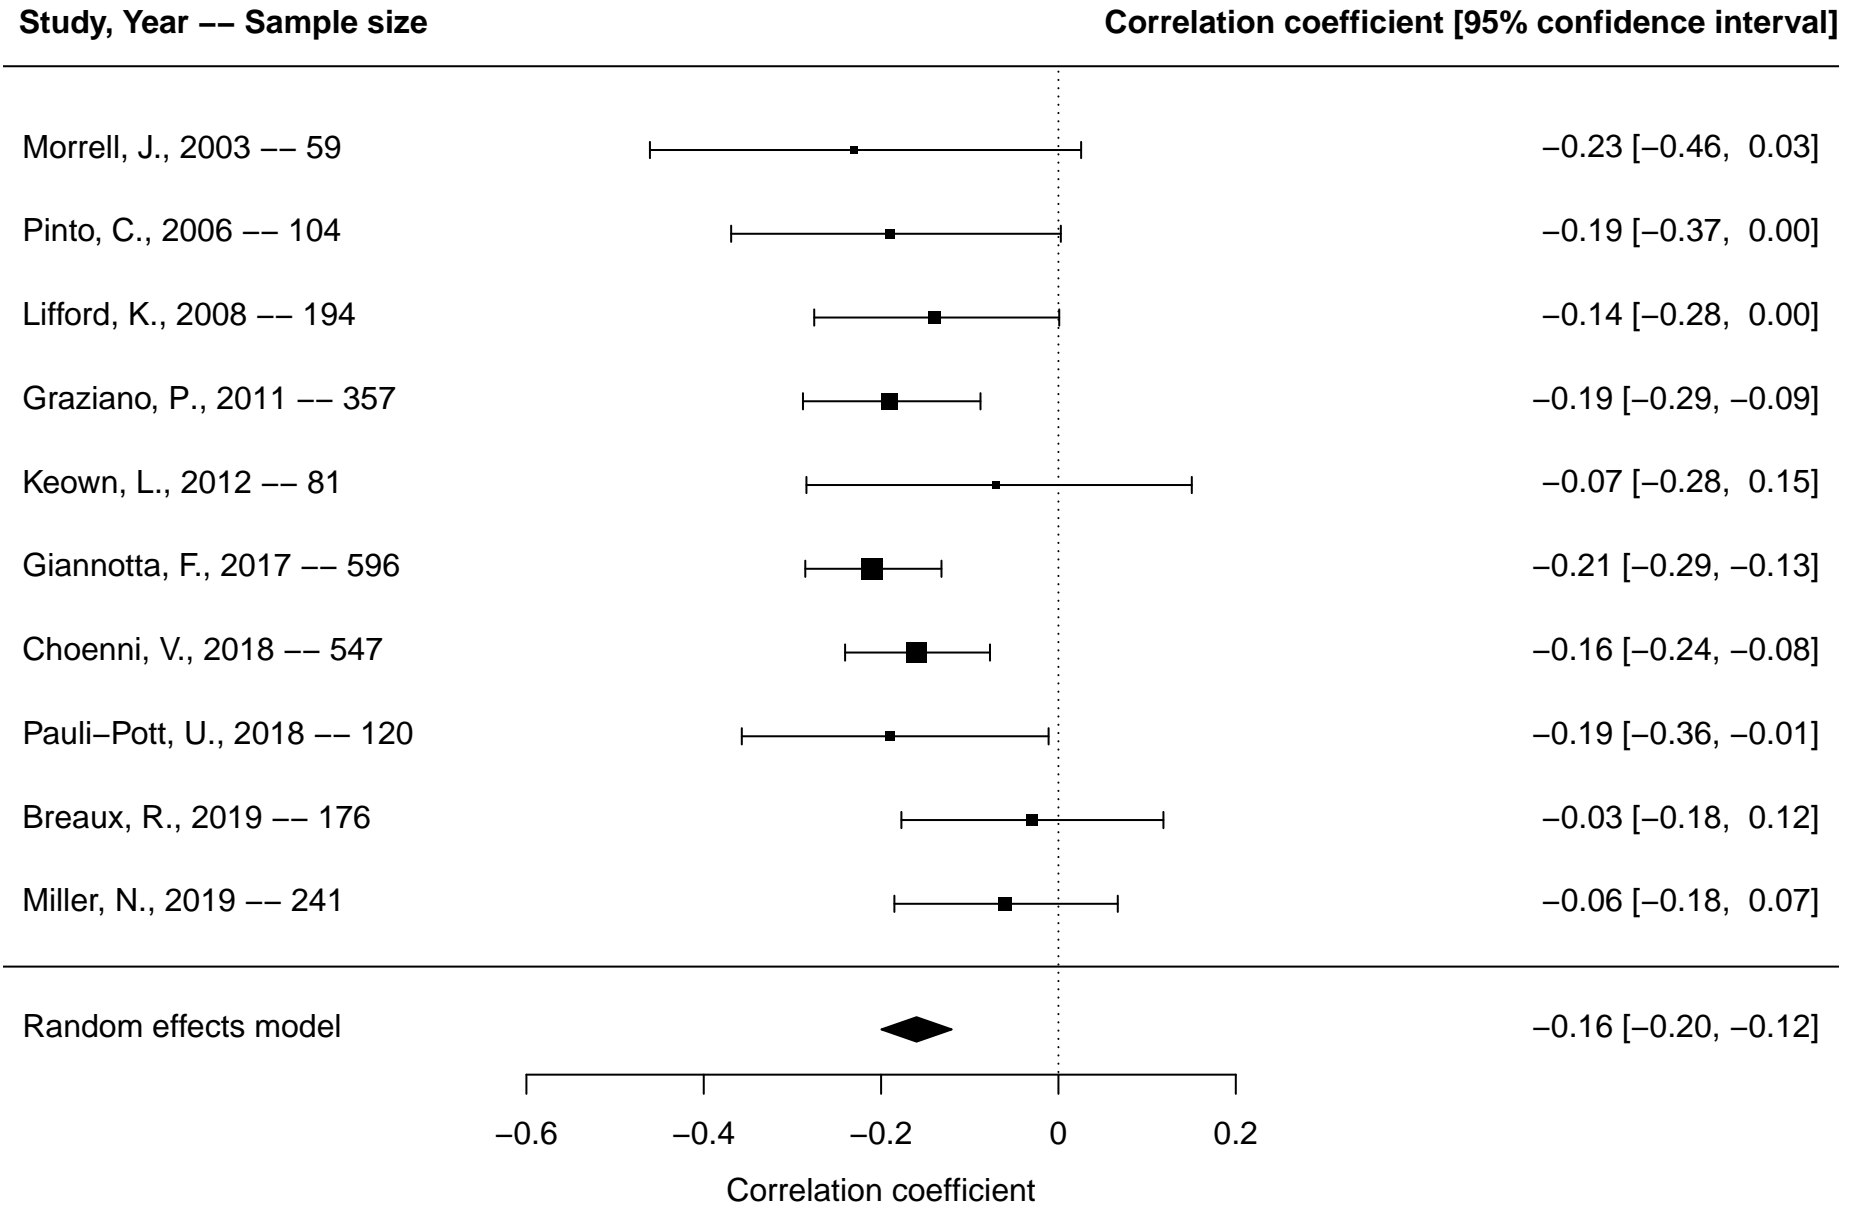

\*Overall includes studies reporting on any included ADHD outcomes (diagnosis, ADHD symptoms, inattention, hyperactivity/impulsivity)

**Figure S12.** Forest plot of meta-analysis of sensitivity/warmth and inattention based on studies reporting continuous outcomes

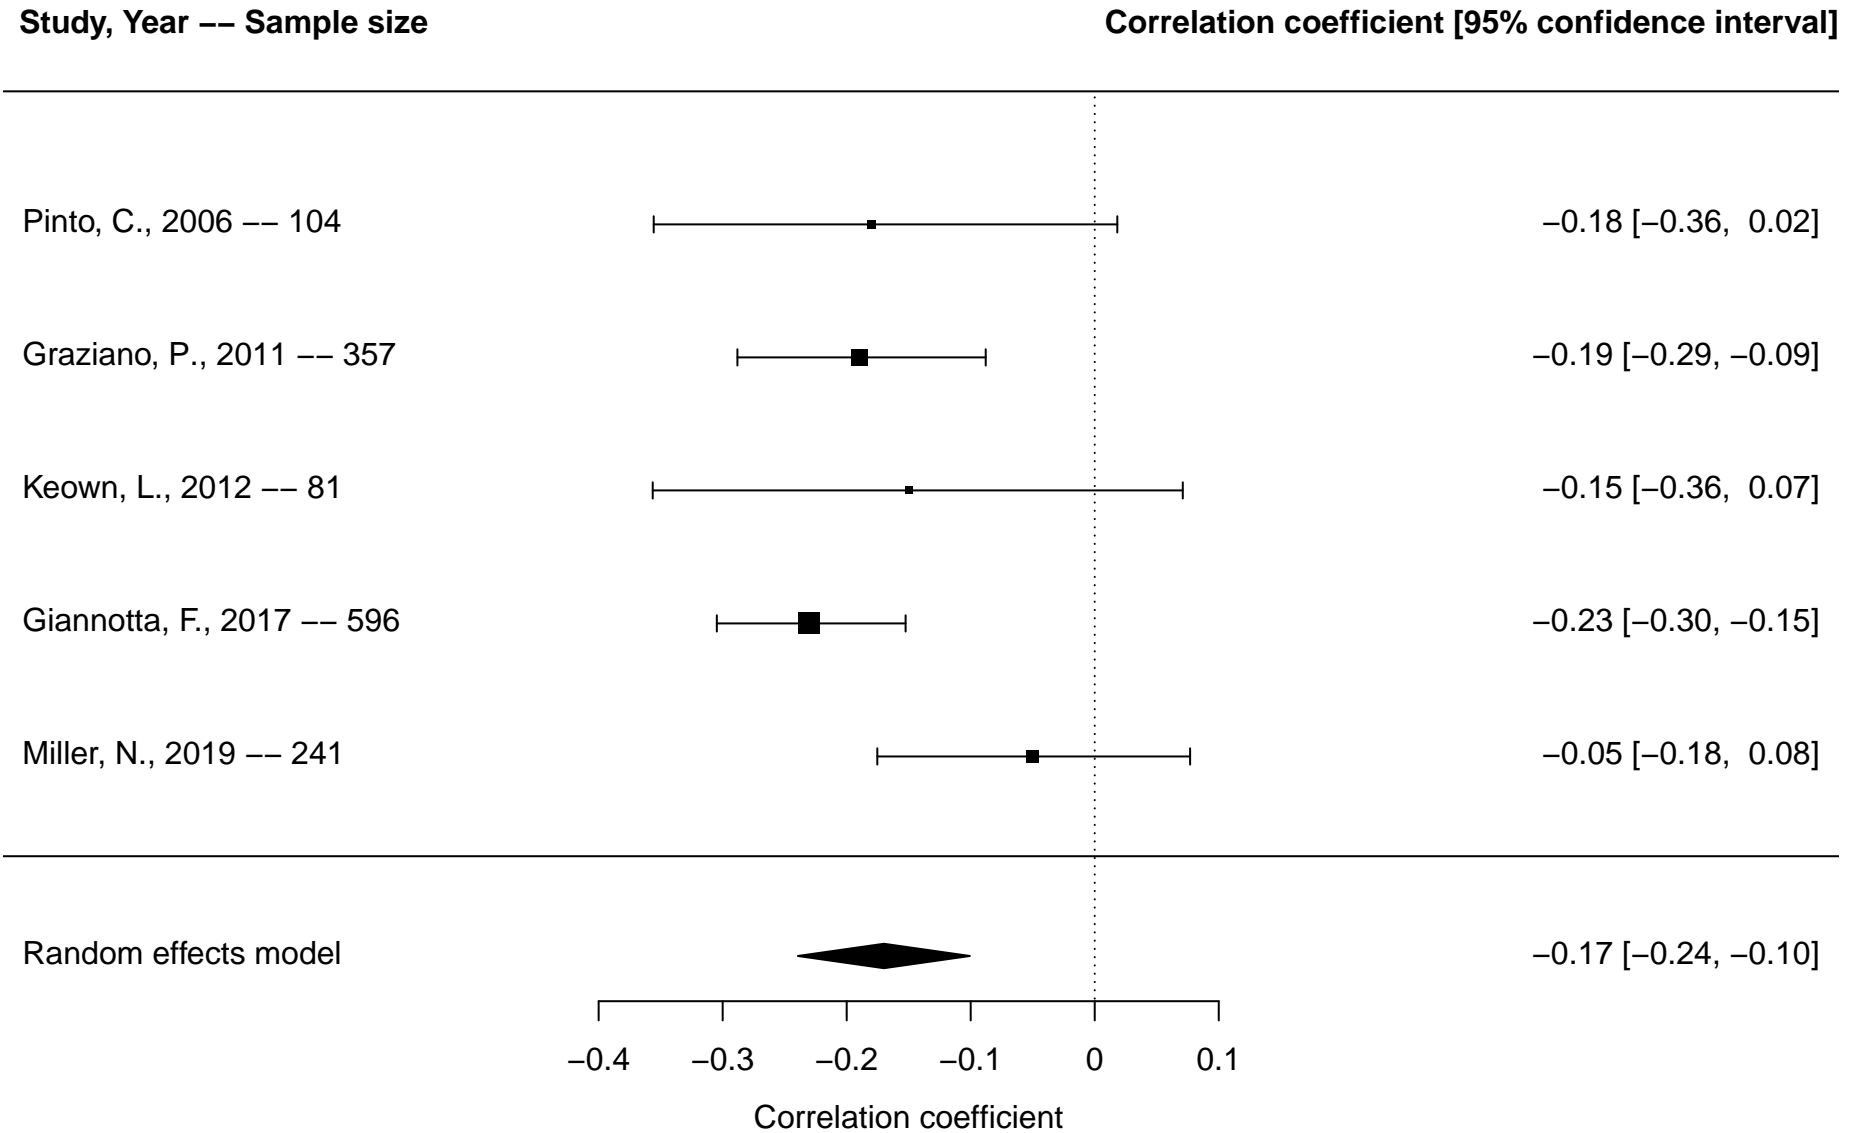

**Figure S13.** Forest plot of meta-analysis of sensitivity/warmth and hyperactivity/impulsivity based on studies reporting continuous outcomes

**Study, Year -- Sample size**

**Correlation coefficient [95% confidence interval]**

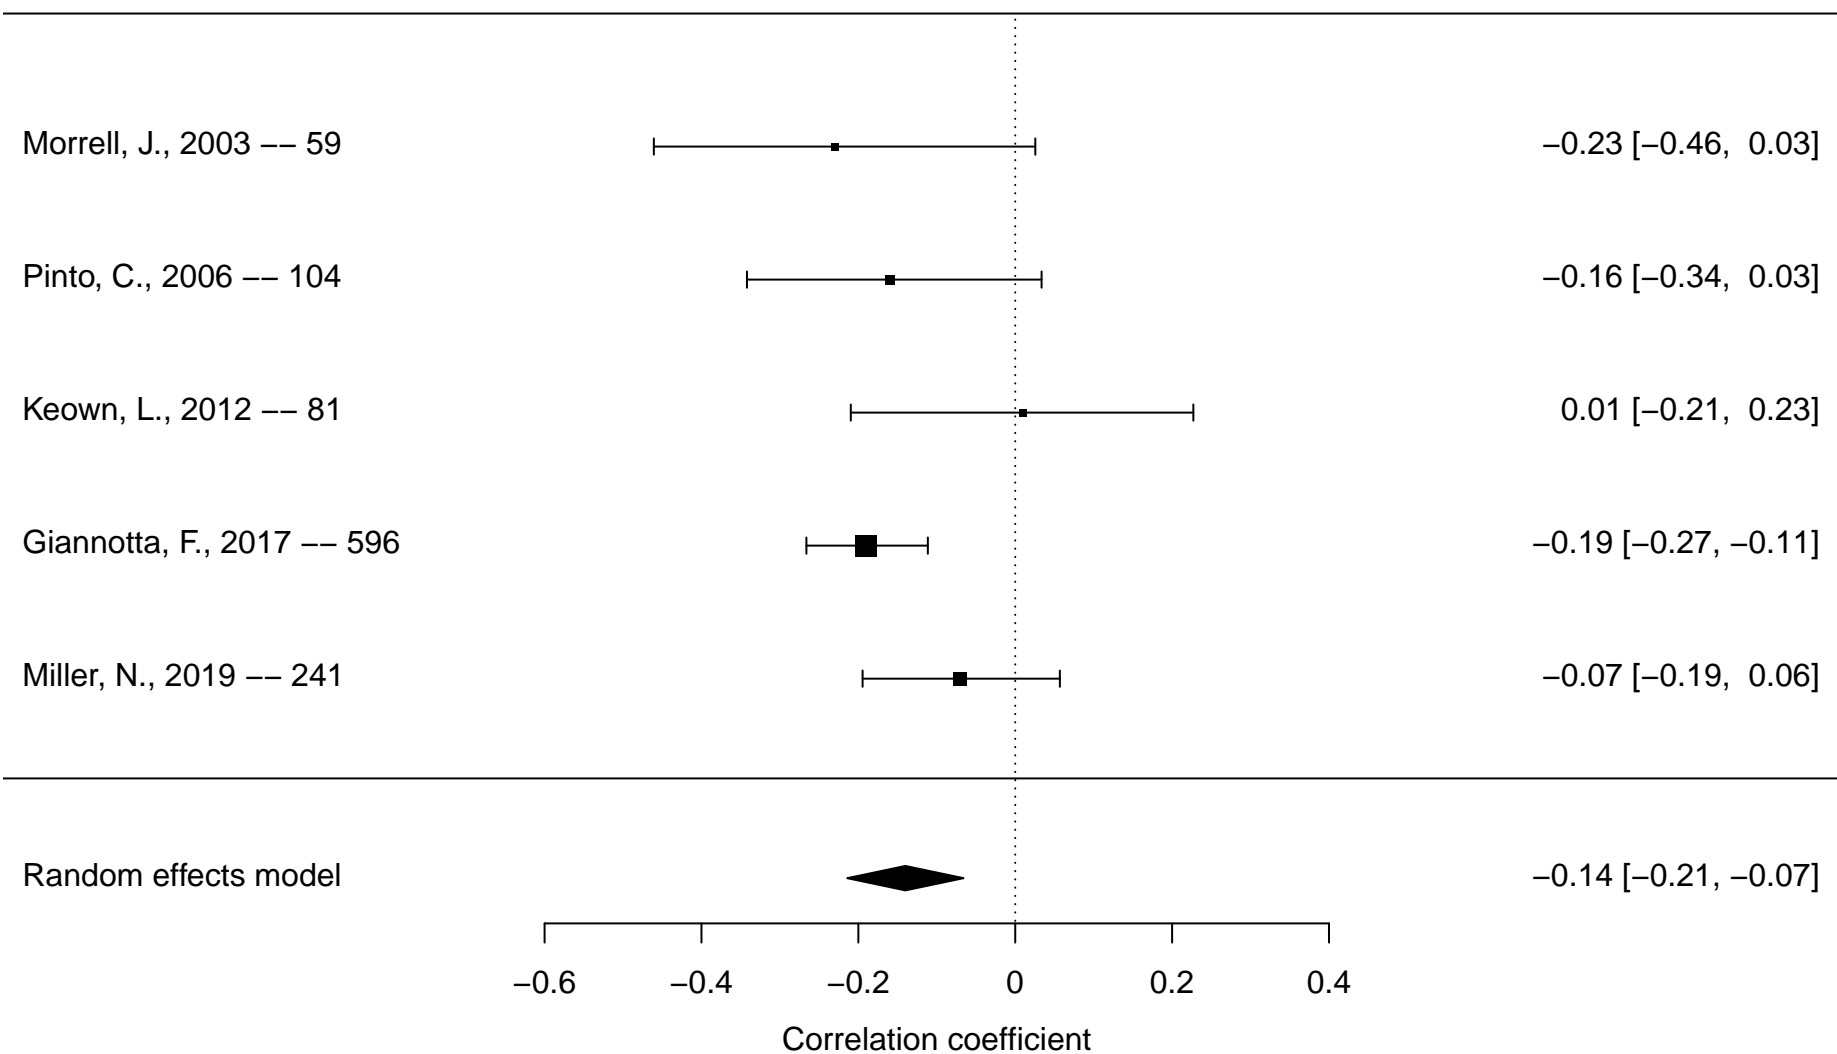

**Figure S14.** Forest plot of meta-analysis of intrusiveness/reactivity and attention-deficit/hyperactivity disorder (ADHD) overall\* based on studies reporting continuous outcomes

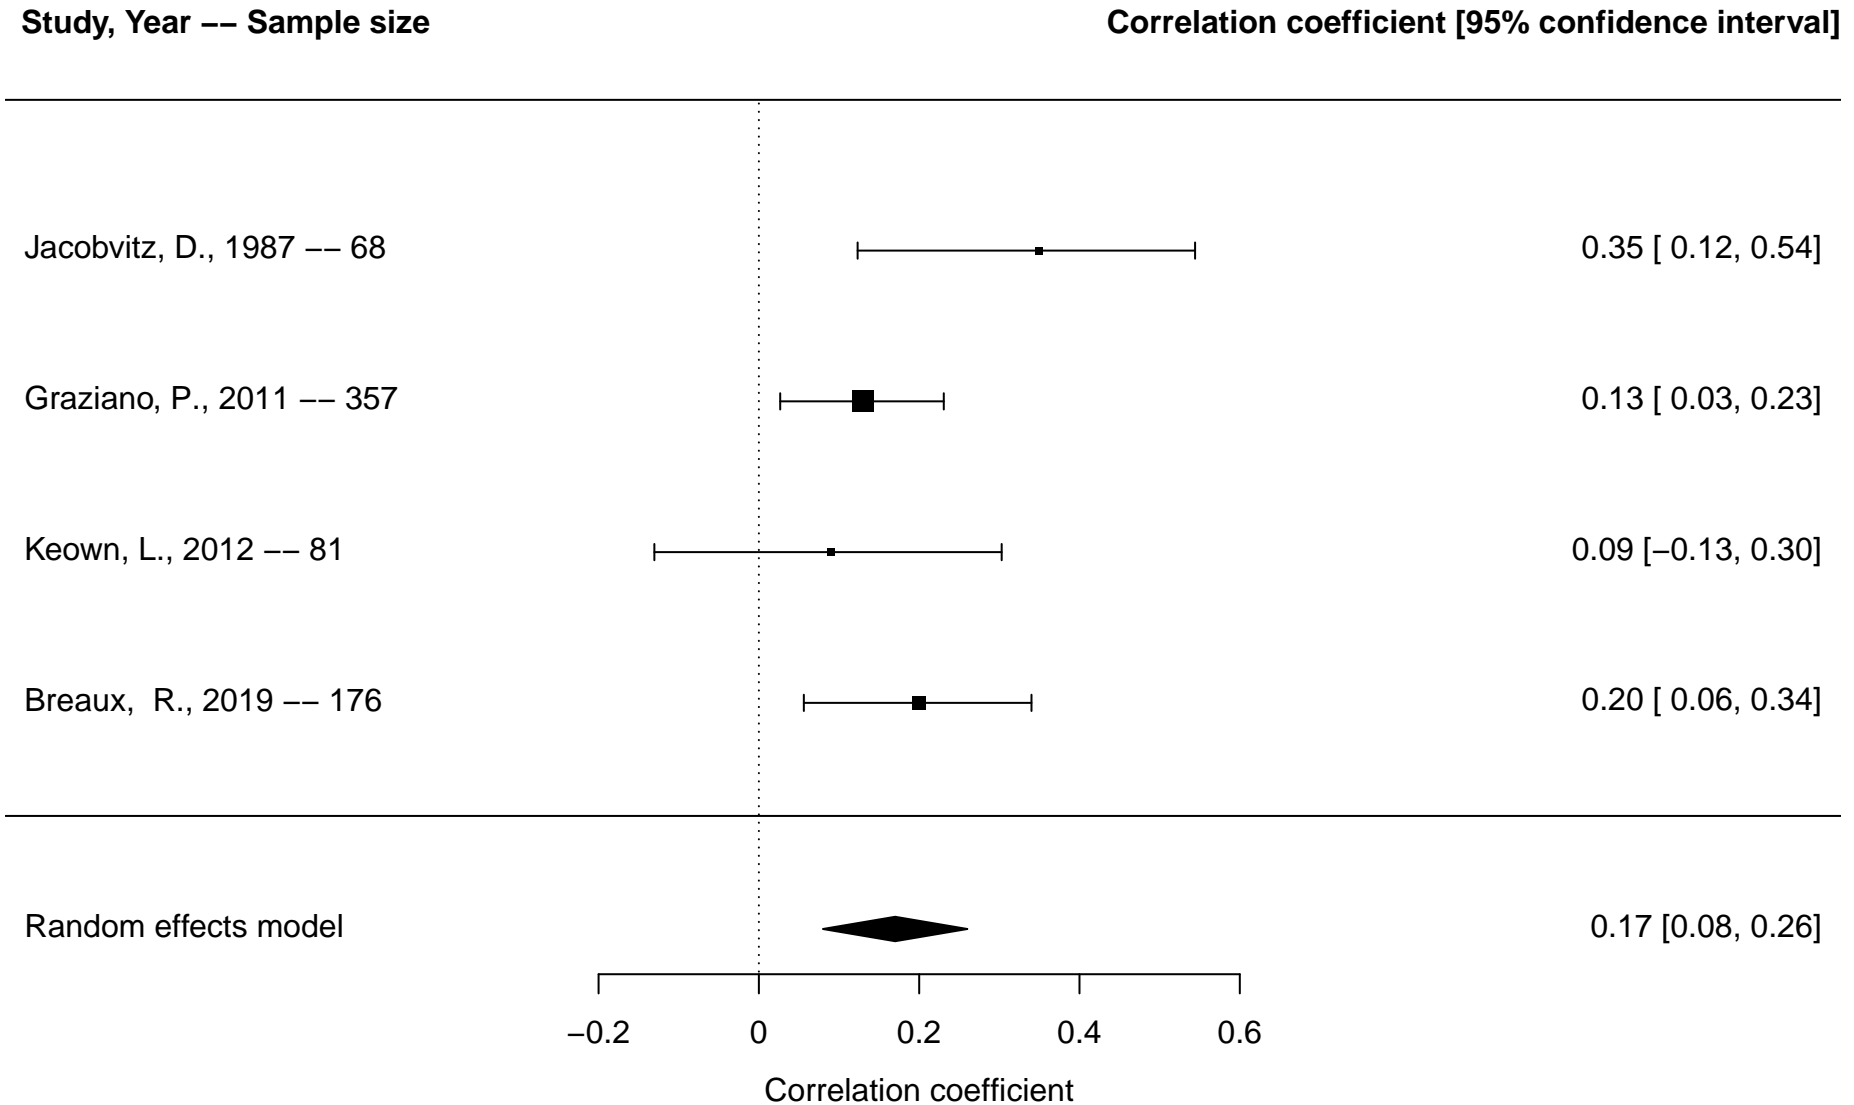

\*Overall includes studies reporting on any included ADHD outcomes (diagnosis, ADHD symptoms, inattention, hyperactivity/impulsivity)

**Figure S15.** Forest plot of meta-analysis of negative/harsh discipline and attention-deficit/hyperactivity disorder (ADHD) overall\* based on studies reporting continuous outcomes

**Study, Year -- Sample size**

**Correlation coefficient [95% confidence interval]**

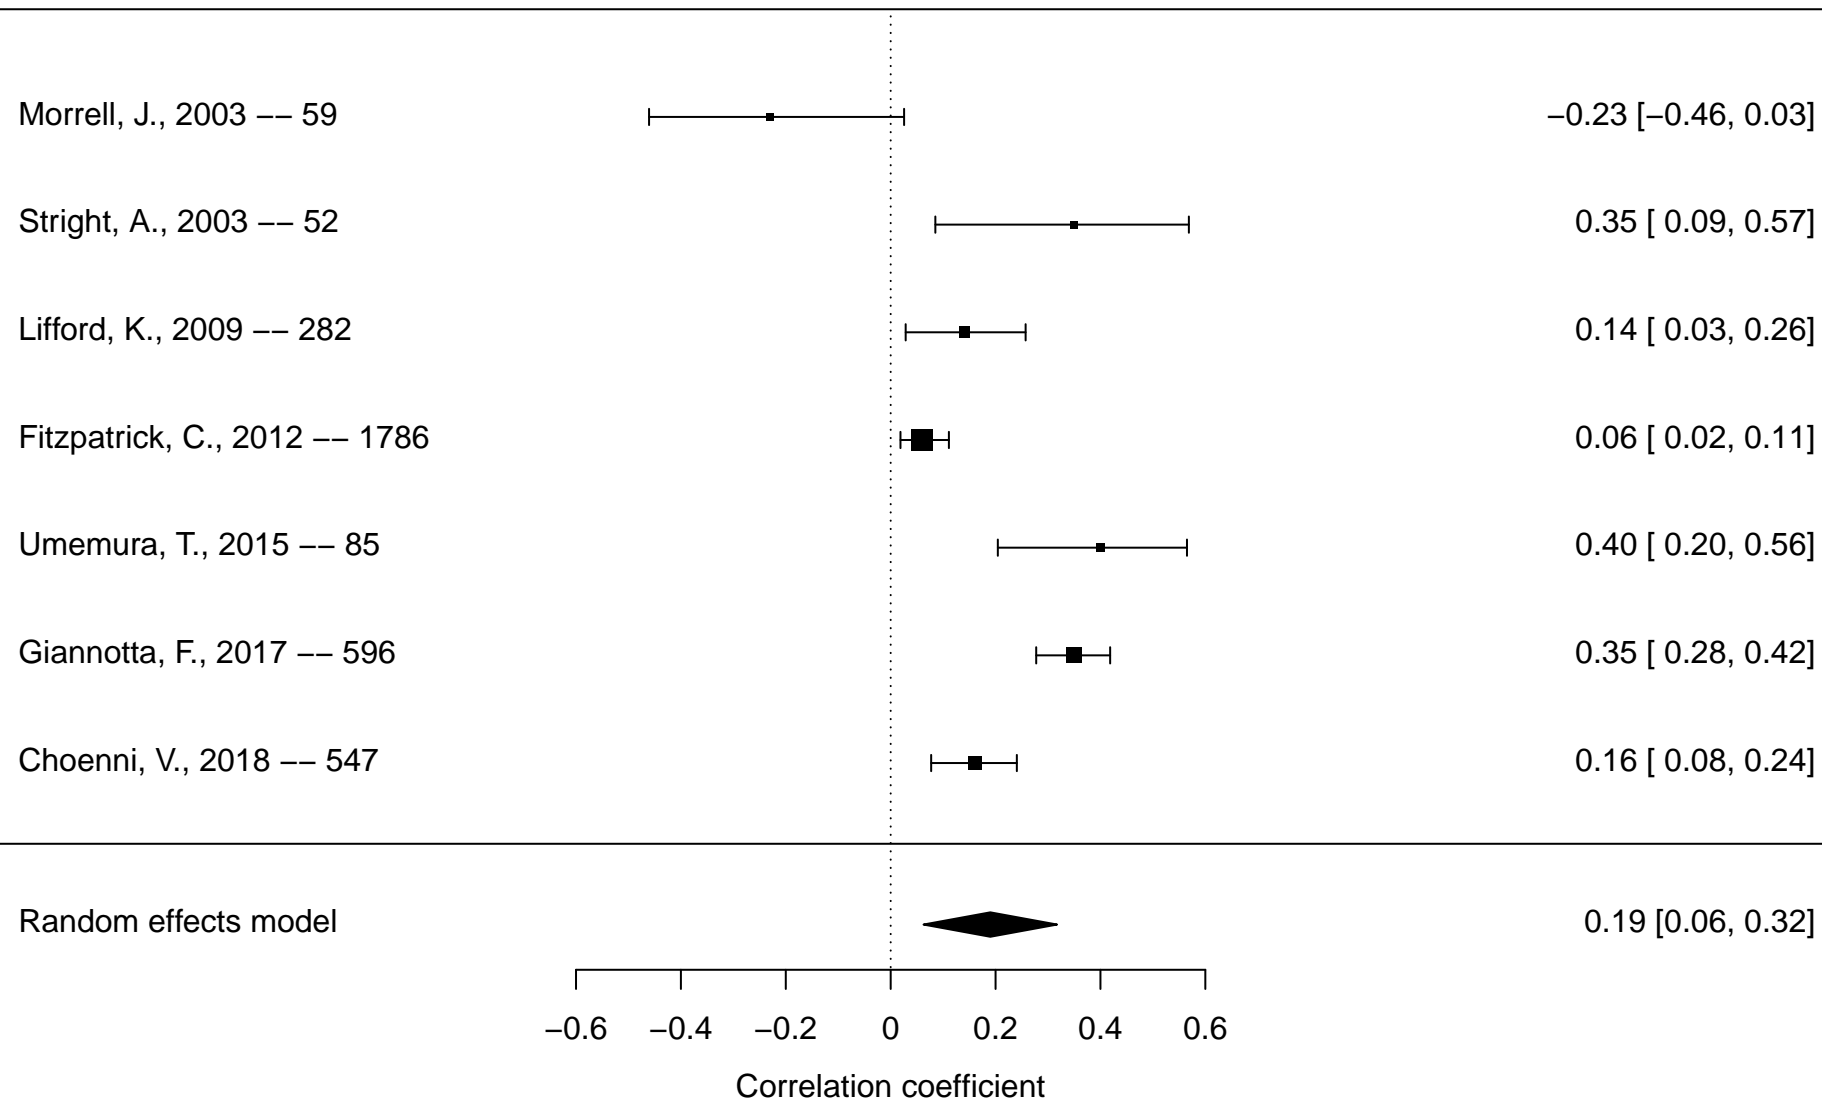

\*Overall includes studies reporting on any included ADHD outcomes (diagnosis, ADHD symptoms, inattention, hyperactivity/impulsivity)



**Figure S16.** Forest plot of meta-analysis of media exposure and attention-deficit/hyperactivity disorder (ADHD) overall\* based on studies reporting dichotomous outcomes

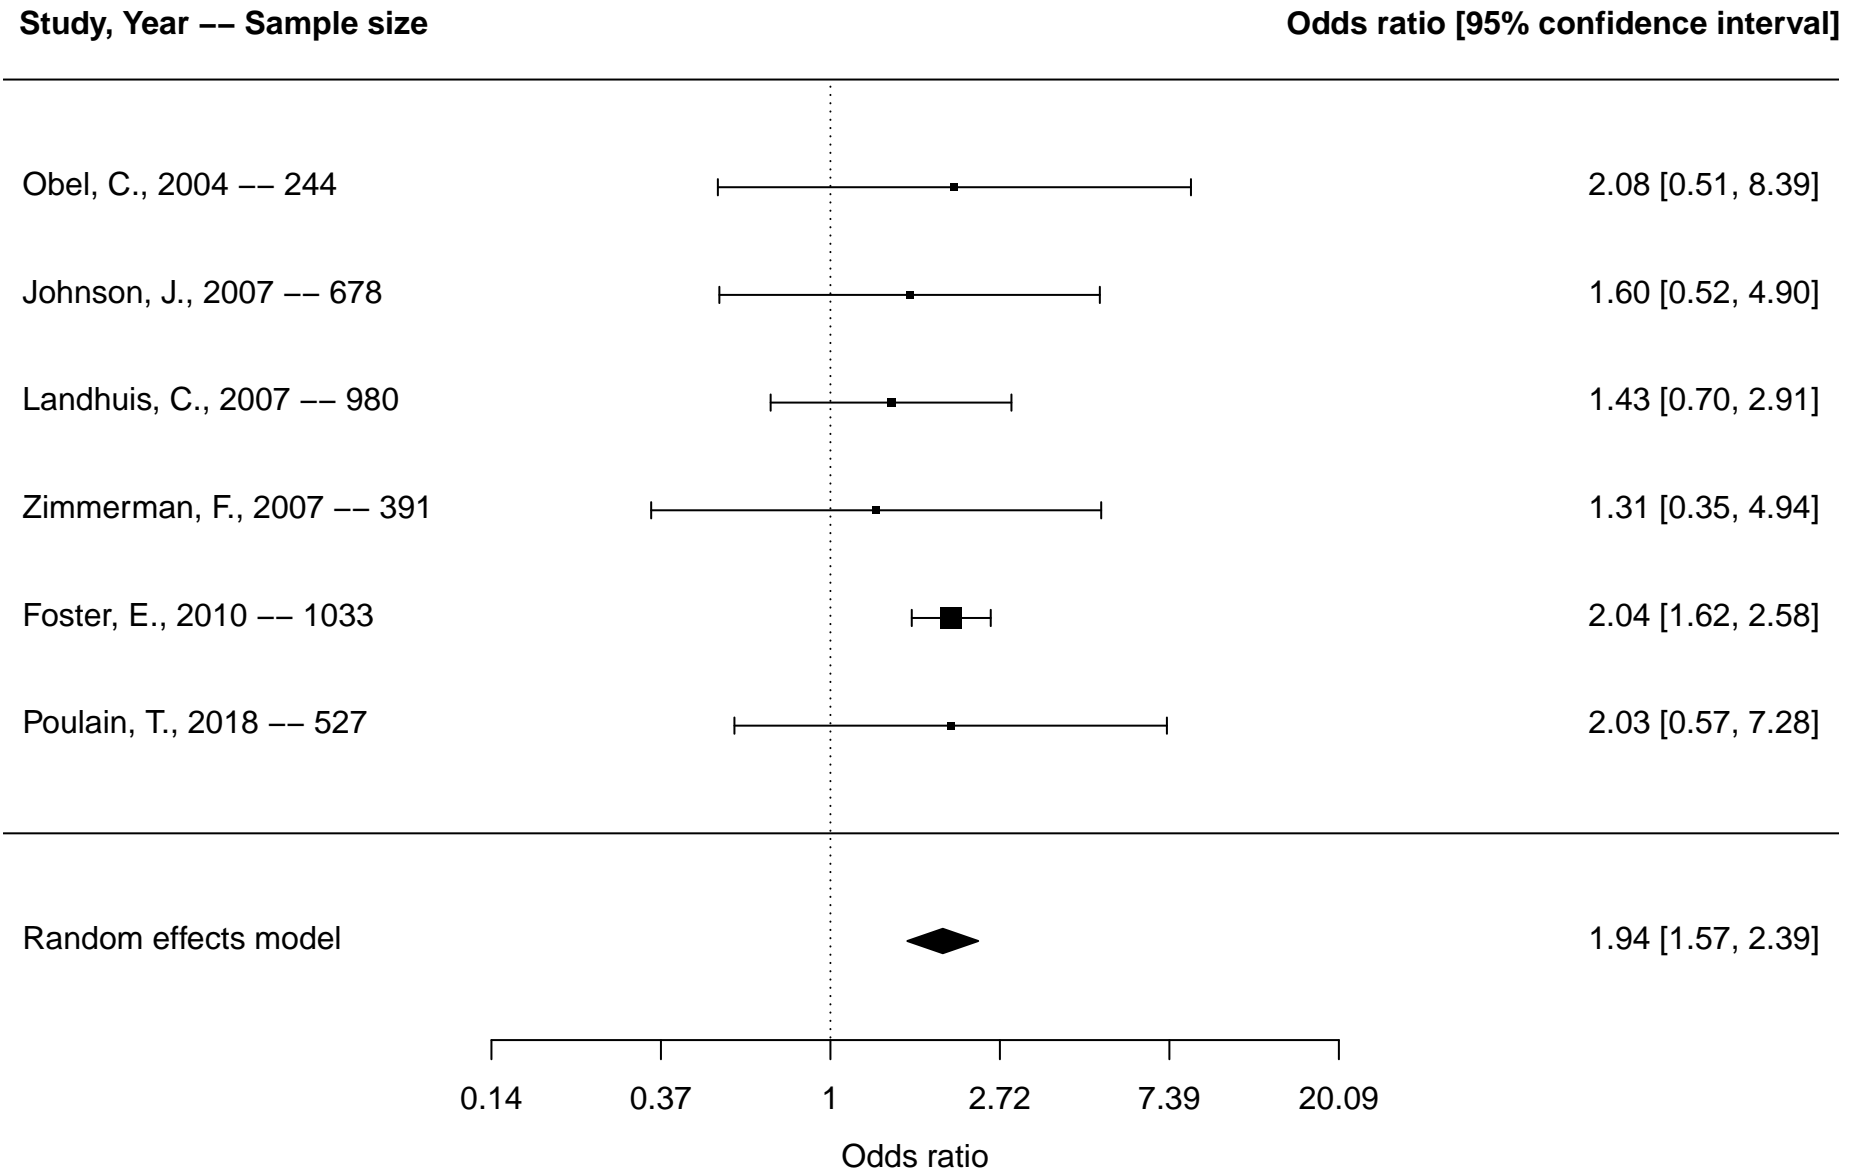

\*Overall includes studies reporting on any included ADHD outcomes (diagnosis, ADHD symptoms, inattention, hyperactivity/impulsivity)

**Figure S17.** Forest plot of meta-analysis of media exposure and attention-deficit/hyperactivity disorder (ADHD) overall\* based on studies reporting continuous outcomes

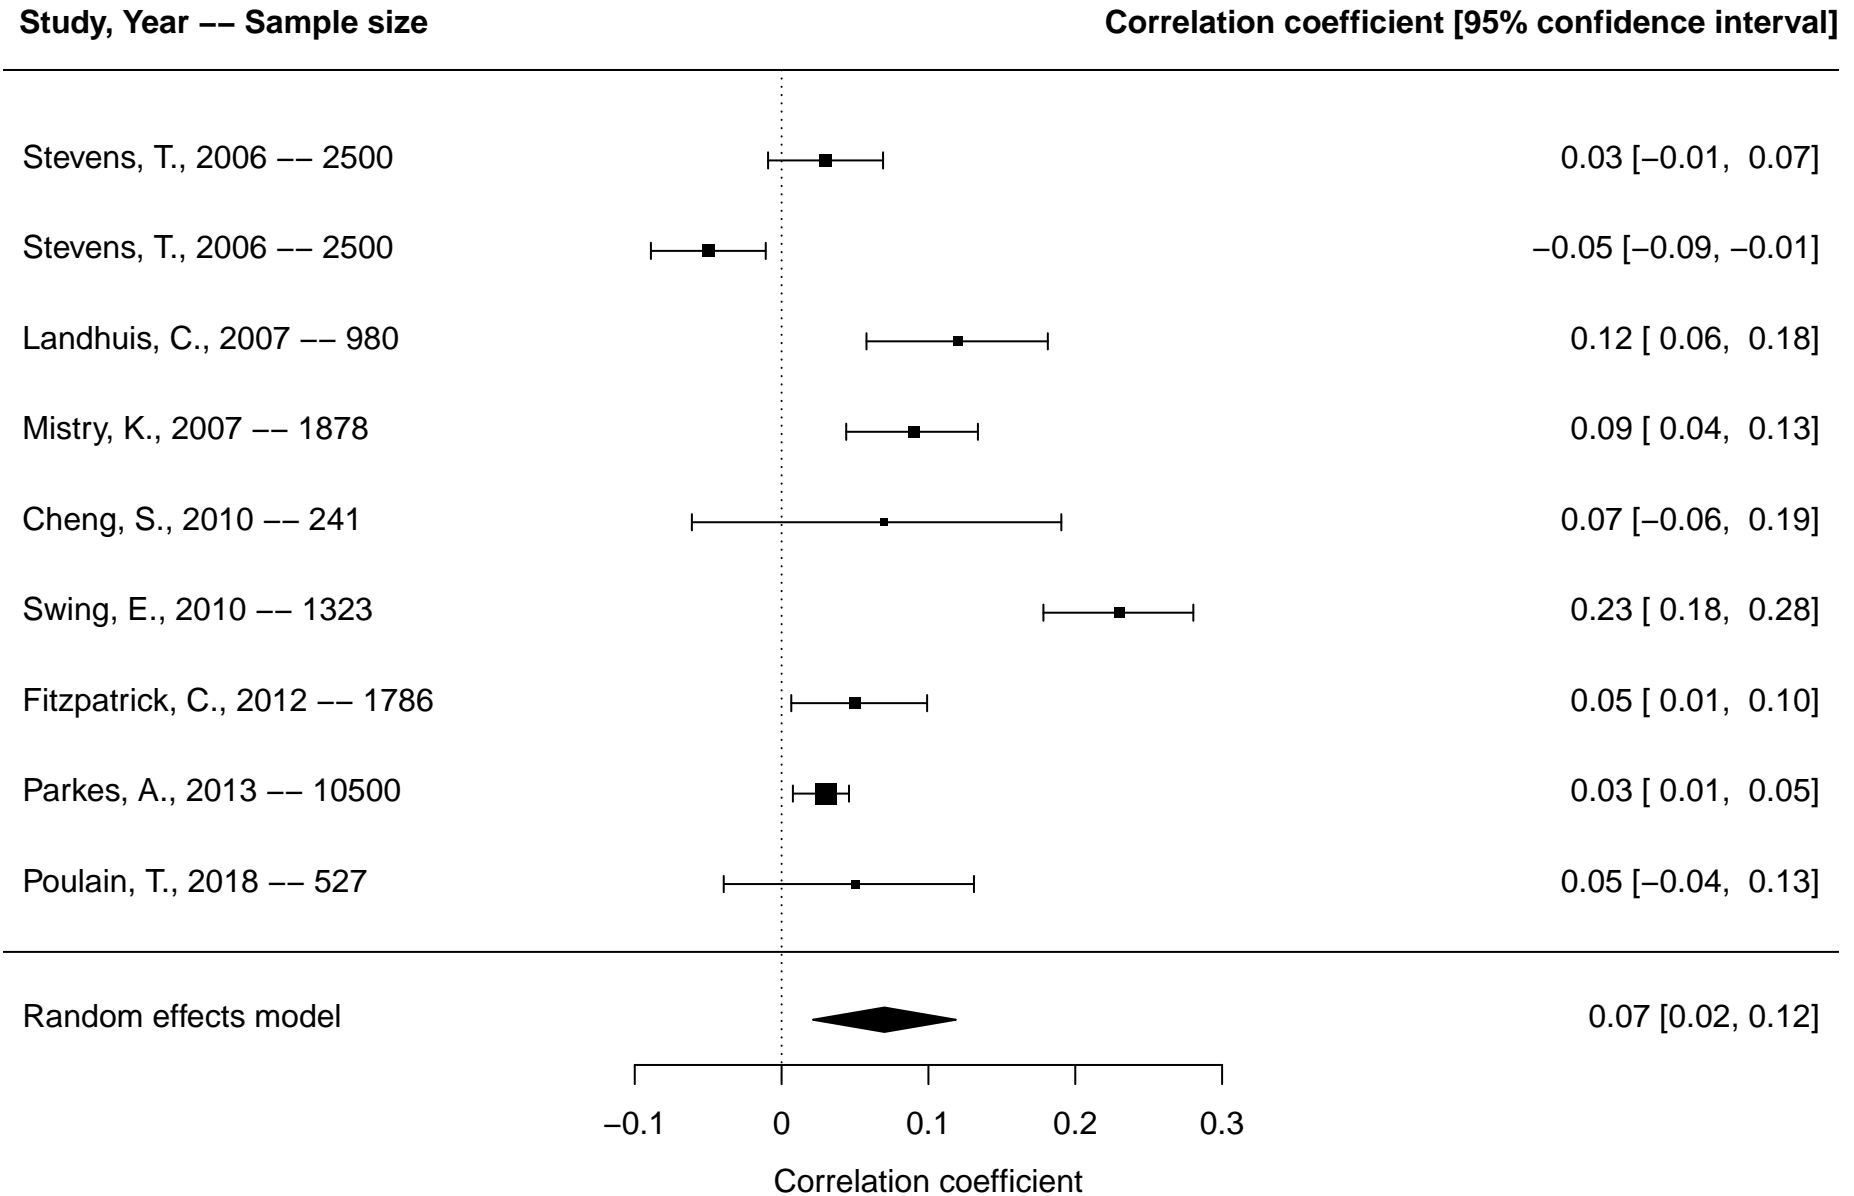

\*Overall includes studies reporting on any included ADHD outcomes (diagnosis, ADHD symptoms, inattention, hyperactivity/impulsivity)

**Figure S18.** Forest plot of meta-analysis of media exposure and inattention based on studies reporting dichotomous outcomes

**Study, Year -- Sample size**

**Odds ratio [95% confidence interval]**

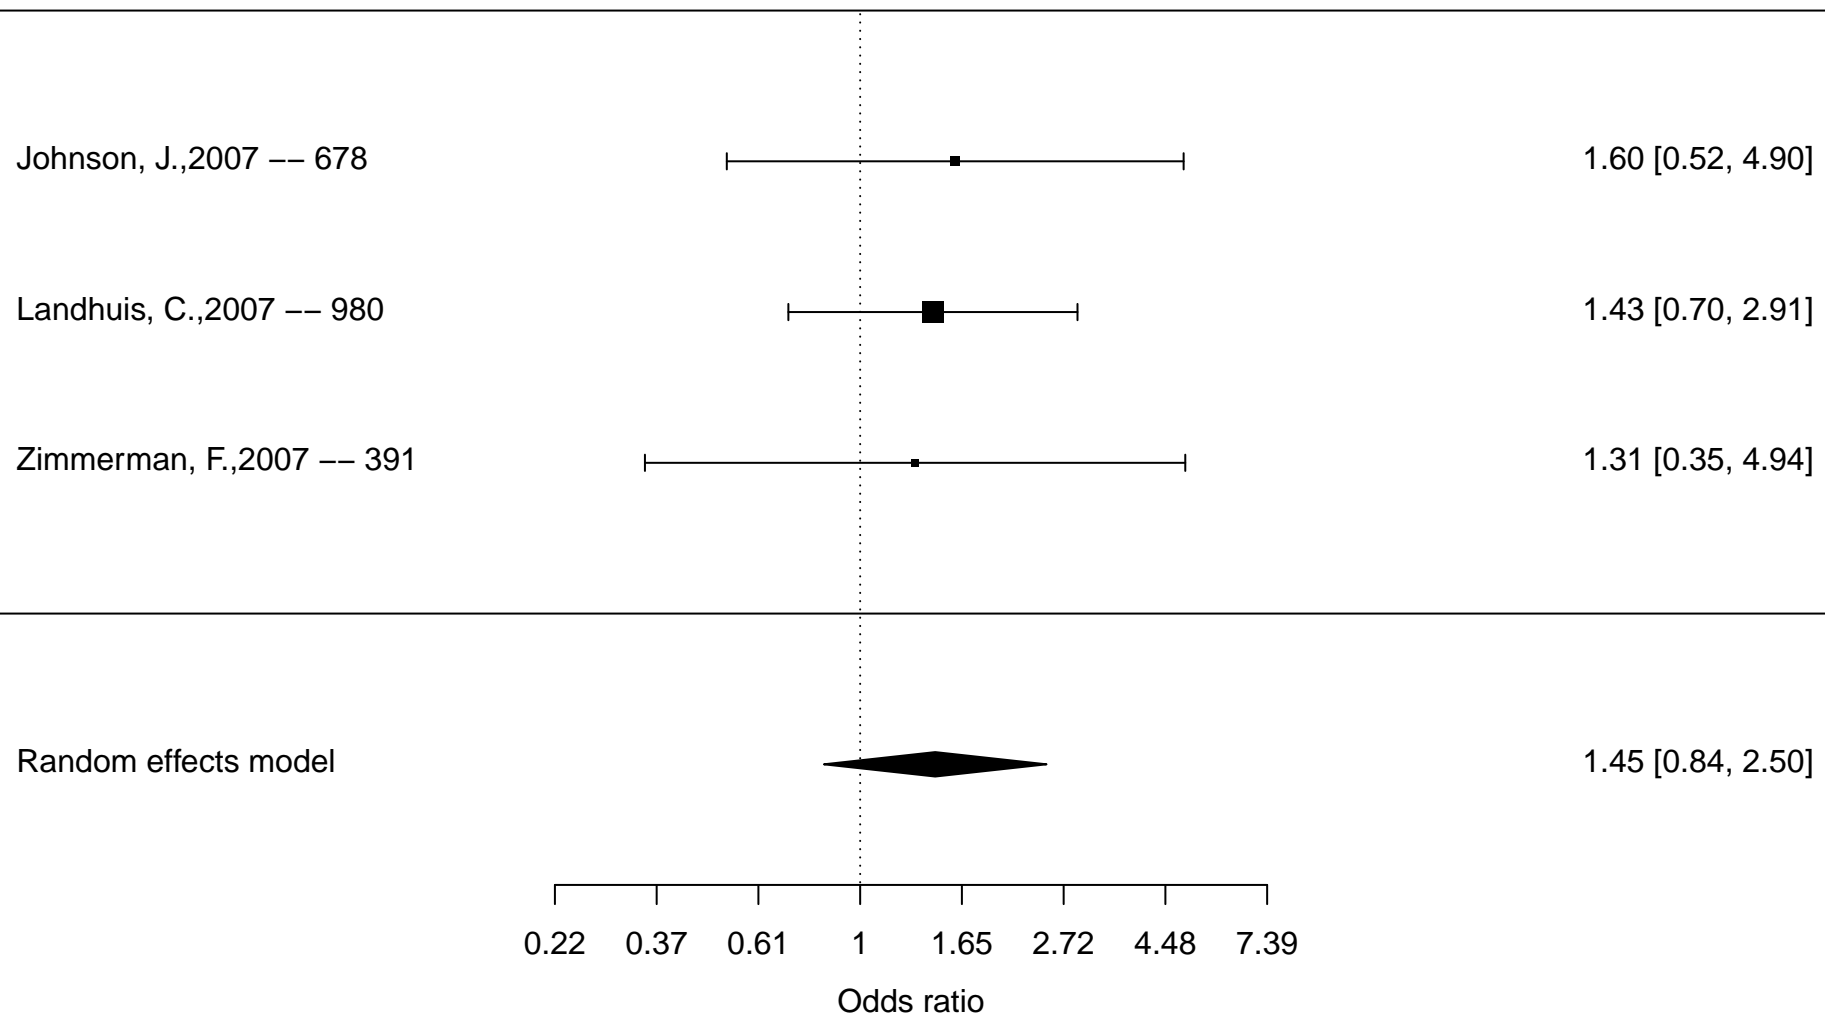

**Figure S19.** Forest plot of meta-analysis of media exposure and inattention based on studies reporting continuous outcomes

**Study, Year -- Sample size**

**Correlation coefficient [95% confidence interval]**

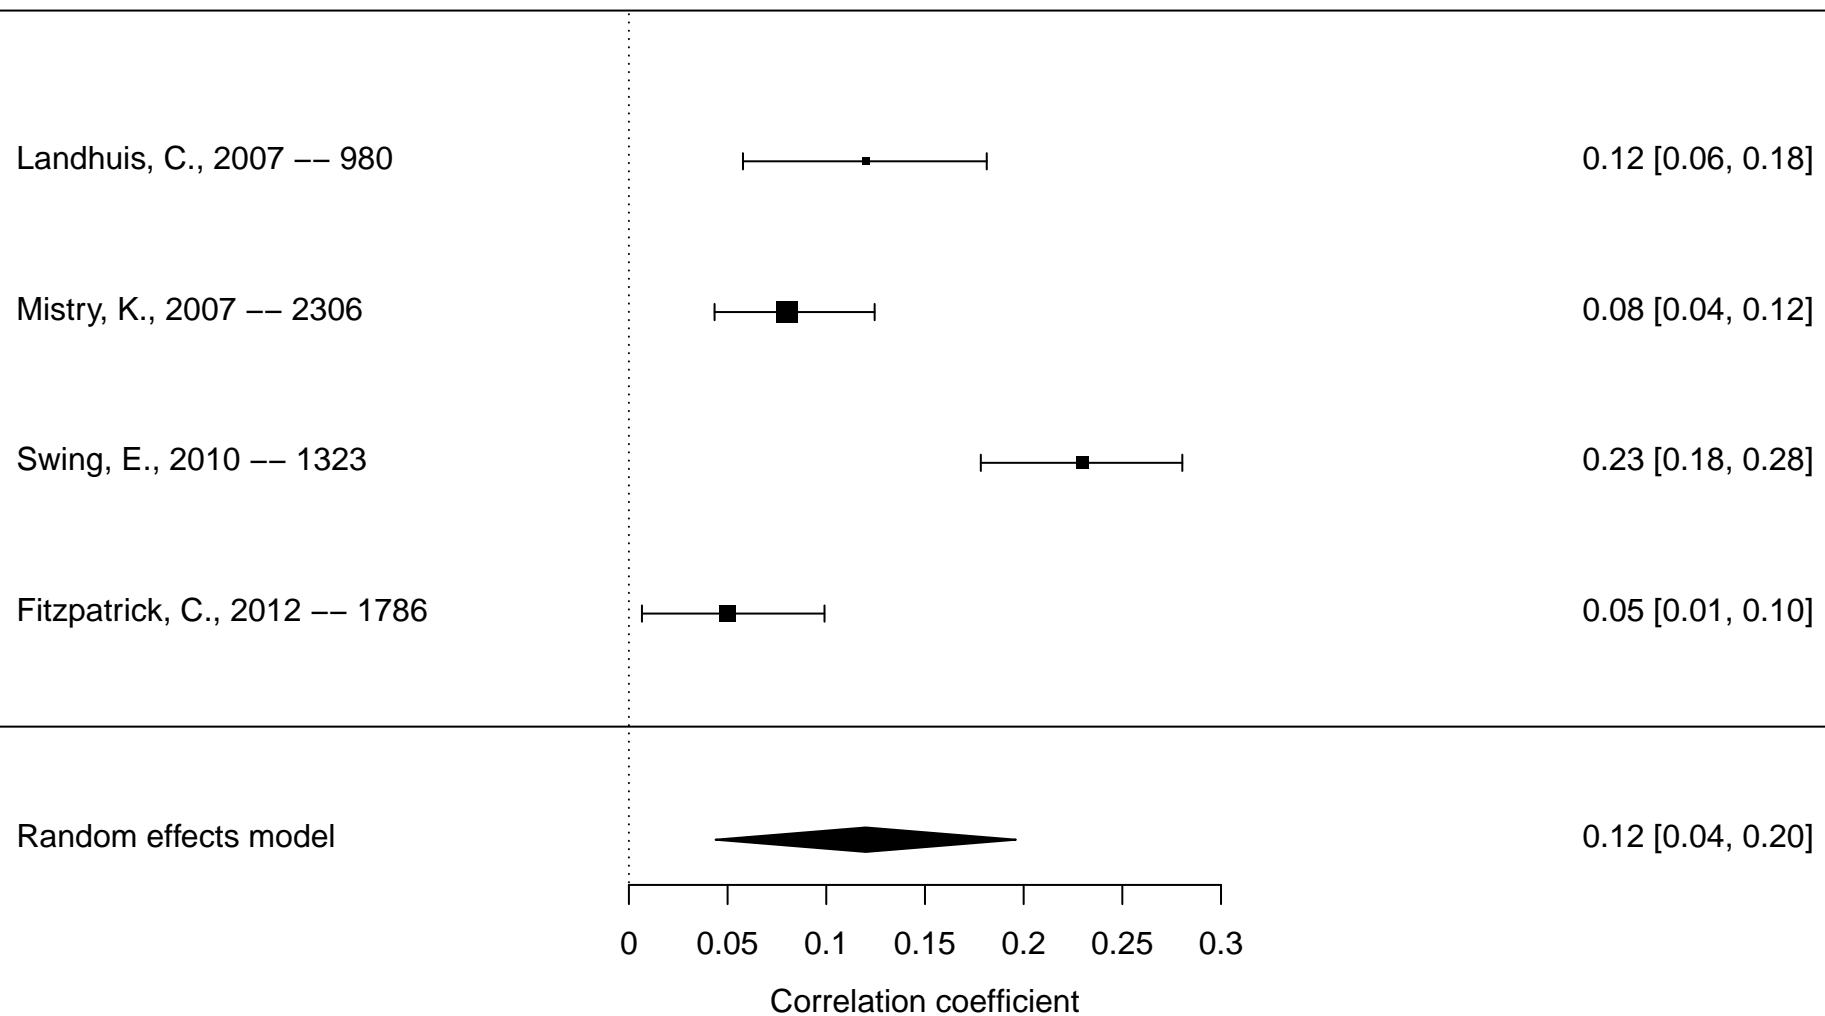

Supplement: 11121_2022_1358_MOESM1_ESM.pdf [file 11121_2022_1358_MOESM1_ESM.pdf]
